# Supplementary material for: STAT3 Activity Promotes Programmed-Death Ligand 1 Expression and Suppresses Immune Responses in Breast Cancer
Source: PubMed Central journal article supplement (PMC6827034; doi:10.3390/cancers11101479), 2019-10-01

Article

# STAT3 Activity Promotes Programmed-Death Ligand 1 Expression and Suppresses Immune Responses in Breast Cancer

Ioannis Zerdes <sup>1,\*</sup>, Majken Wallerius <sup>1</sup>, Emmanouil G. Sifakis <sup>1</sup>, Tatjana Wallmann <sup>1</sup>, Stina Betts <sup>1</sup>, Margarita Bartish <sup>1</sup>, Nikolaos Tsesmetzis <sup>2</sup>, Nicholas P. Tobin <sup>1</sup>, Christos Coucoravas <sup>3</sup>, Jonas Bergh <sup>1,4</sup>, George Z. Rassidakis <sup>1,5</sup>, Charlotte Rolny <sup>1</sup> and Theodoros Foukakis <sup>1,4,\*</sup>

**Table S1.** List of cancer cell lines used in the study.

| Cell Line               | Tissue               | Organism | Disease                             | Comments                                                                                  |
|-------------------------|----------------------|----------|-------------------------------------|-------------------------------------------------------------------------------------------|
| MCF7 <sup>1</sup>       | Mammary gland/breast | Human    | Adenocarcinoma                      | Luminal                                                                                   |
| MDA-MB-231 <sup>1</sup> | Mammary gland/breast | Human    | Adenocarcinoma                      | Triple-negative                                                                           |
| BT549 <sup>1</sup>      | Mammary gland/breast | Human    | Ductal carcinoma                    | Triple-negative                                                                           |
| SKRB3 <sup>2</sup>      | Mammary gland/breast | Human    | Adenocarcinoma                      | ER-/PR-/HER2+                                                                             |
| 4T1 <sup>3</sup>        | Mammary gland/breast | Mouse    | Animal stage IV human breast cancer | Originated from tumors developed in BALB/cfC3H mouse; highly metastatic; Triple –negative |
| MAC2A <sup>4</sup>      | Lymphoid             | Human    | Anaplastic large cell lymphoma      | ALK –negative                                                                             |
| HDLM2 <sup>5</sup>      | Lymphoid             | Human    | Hodgkin lymphoma                    | -                                                                                         |

<sup>1</sup> Purchased from Sigma-Aldrich and ATCC, USA; <sup>2</sup> Provided by Sarah Walker and David Frank (Department of Medical Oncology, Dana-Farber Cancer Institute, and Department of Medicine, Harvard Medical School, Boston, MA, USA); <sup>3</sup> Purchased from Karmanos Cancer Institute, Wayne State University, USA; <sup>4</sup> A gift from Dr. Marshal Kadin (Boston, MA, USA); <sup>5</sup> Purchased from DSMZ, Germany; **Abbreviations:** ER, estrogen receptor; PR, progesterone receptor; HER2, human epidermal growth factor receptor 2; ALK, Anaplastic Lymphoma Kinase.

**Table S2.** List of antibodies used in the study.

| Antibody        | Cat. no   | Species              | Company                   | Method(s)         |
|-----------------|-----------|----------------------|---------------------------|-------------------|
| STAT3           | #4904     | Rabbit (79D7)        | Cell Signaling Technology | Western blot      |
| pSTAT3 (Y705)   | sc-8059   | Mouse (B-7)          | Santa Cruz Biotechnology  | Western blot, IHC |
| pSTAT3 (Y705)   | #9145     | Rabbit (D3A7)        | Cell Signaling Technology | Western blot, IHC |
| PD-L1           | #13684    | Rabbit (E1L3N)       | Cell Signaling Technology | Western blot, IHC |
| PD-L1           | #740-4859 | Rabbit (clone SP263) | Ventana (Roche)           | IHC               |
| b-actin         | A5441     | Mouse                | Sigma-Aldrich             | Western blot      |
| Anti-rabbit IgG | #7074     | Goat                 | Cell Signaling Technology | Western blot      |

|                             |       |                   |                           |                    |
|-----------------------------|-------|-------------------|---------------------------|--------------------|
| (HRP-linked)                |       |                   |                           |                    |
| Anti-mouse IgG (HRP-linked) | #7076 | Horse             | Cell Signaling Technology | Western blot       |
| Anti-biotin (HRP-linked)    | #7075 | Goat              | Cell Signaling Technology | Western blot       |
| <b>Antibodies</b>           |       | <b>Company</b>    |                           | <b>Method</b>      |
| CD163                       |       | Leica             |                           |                    |
| CD11c                       |       |                   |                           |                    |
| AlexaFluor 488              |       | Life Technologies |                           | Immunofluorescence |
| AlexaFluor 546              |       |                   |                           |                    |
| DAPI                        |       | Invitrogen Corp   |                           |                    |
| <b>Antibodies</b>           |       | <b>Company</b>    |                           | <b>Method</b>      |
| CD11b (M1/70)               |       |                   |                           |                    |
| CD45 (30-F11)               |       |                   |                           |                    |
| Ly6C (AL-21)                |       |                   |                           |                    |
| Ly6G (1A8)                  |       |                   |                           |                    |
| CD86 (GL1)                  |       |                   |                           |                    |
| CD11c (HL3)                 |       |                   |                           |                    |
| CD3 (500A2/145-2c11)        |       |                   |                           |                    |
| CD8 (53-6.7)                |       | BD Bioscience     |                           | Flow cytometry     |
| CD4 (RM4-5)                 |       |                   |                           |                    |
| CD69 (H1.2F3)               |       |                   |                           |                    |
| CD49b (HM ALPHA2)           |       |                   |                           |                    |
| MHC class II (I-A/I-E)      |       |                   |                           |                    |
| MHC class I (H-2K(d))       |       |                   |                           |                    |
| CD25 (PC61)                 |       |                   |                           |                    |
| FoxP3 (MF23)                |       |                   |                           |                    |
| F4/80 (BM8)                 |       |                   |                           |                    |
| MRC1 (C068C2)               |       |                   |                           |                    |
| CD8a (53-6.7)               |       | BioLegend         |                           | Flow cytometry     |
| CD279 (29F.1A12)            |       |                   |                           |                    |
| CD274 (10F.9G2)             |       |                   |                           |                    |

**Table S3.** List of primers, siRNA and shRNA target sequences used in the study.

| Gene                       | Sequence (5'-3')                                                     | Company                         | Method                         |
|----------------------------|----------------------------------------------------------------------|---------------------------------|--------------------------------|
| <b>PD-L1 (human)</b>       | Forward: CTCCAAATGAAAGGACTCAC<br>Reverse: TCCCTTTTCTTAAACGGAAG       | Sigma-Aldrich                   | RT-qPCR                        |
| <b>b-actin (human)</b>     | Forward: GACGACATGGAGAAAATCTG<br>Reverse: ATGATCTGGGTCATCTTCTC       | Sigma-Aldrich                   | RT-qPCR                        |
| <b>pd-l1 (mouse)</b>       | Forward: CAAGTGAGAATGCTAGATGTG<br>Reverse: TCCATCTTGAGTCTTTGGAC      | Sigma-Aldrich                   | RT-qPCR                        |
| <b>18S rRNA (mouse)</b>    | Forward: TTCCTTACCTGGTTGATCCTGCC<br>Reverse: AGCCATTCGCAGTTTCACTGTAC | Sigma-Aldrich                   | RT-qPCR                        |
| <b>siRNA STAT3 (human)</b> | GAGAUUGACCAGCAGUAUA                                                  | Dharmacon™ (Lafayette, CO, USA) | Transient transfection         |
| <b>shRNA Stat3 (mouse)</b> | NM_011486.3.1238s1c1                                                 | Sigma-Aldrich                   | Lentiviral vector transduction |
| <b>MISSION® Plasmid</b>    | CCGGCCTGAGTTGAATTATCAGCTTCTCGAGAAGCTGATAATTCAACT<br>CAGGTTTTTG       |                                 |                                |

**Abbreviations:** siRNA, small interfering RNA; shRNA, small hairpin RNA; RT-qPCR, real-time quantitative polymerase chain reaction.

**Table S4.** Correlation of PD-L1 protein expression in tumor, immune and total cells\* with pSTAT3 protein expression in human breast cancer patients. Fisher's exact test was used for the statistical analyses. (\* either tumor or immune cells).

|                              | PD-L1 IHC Expression in Tumor Cells |          |                 | PD-L1 IHC Expression in Immune Cells |          |                 | PD-L1 IHC Expression in Total Cells |          |                 |
|------------------------------|-------------------------------------|----------|-----------------|--------------------------------------|----------|-----------------|-------------------------------------|----------|-----------------|
|                              | Positive                            | Negative | <i>p</i> -Value | Positive                             | Negative | <i>p</i> -Value | Positive                            | Negative | <i>p</i> -Value |
| pSTAT3-high ( <i>n</i> = 41) | 22                                  | 19       | 0.66            | 24                                   | 17       | 0.08            | 26                                  | 15       | 0.19            |
| pSTAT3-low ( <i>n</i> = 42)  | 20                                  | 22       |                 | 16                                   | 26       |                 | 20                                  | 22       |                 |

**Table S5.** Correlation of PD-L1 protein expression in tumor cells with grade and Ki67 status in human breast cancer patients.

|                      | PD-L1 IHC expression in tumor cells |                           |                  |
|----------------------|-------------------------------------|---------------------------|------------------|
|                      | Positive ( <i>n</i> = 23)           | Negative ( <i>n</i> = 22) | <i>p</i> -value* |
| <b>Grade 1-2</b>     | 4                                   | 18                        | 1.982e-05        |
| <b>Grade 3</b>       | 19                                  | 4                         |                  |
| <b>Ki67 &lt; 16%</b> | 2                                   | 12                        | 0.00106          |
| <b>Ki67 ≥ 16%</b>    | 20                                  | 9                         |                  |

\* Fisher's exact test. For Ki67, there was one patient with unknown status.

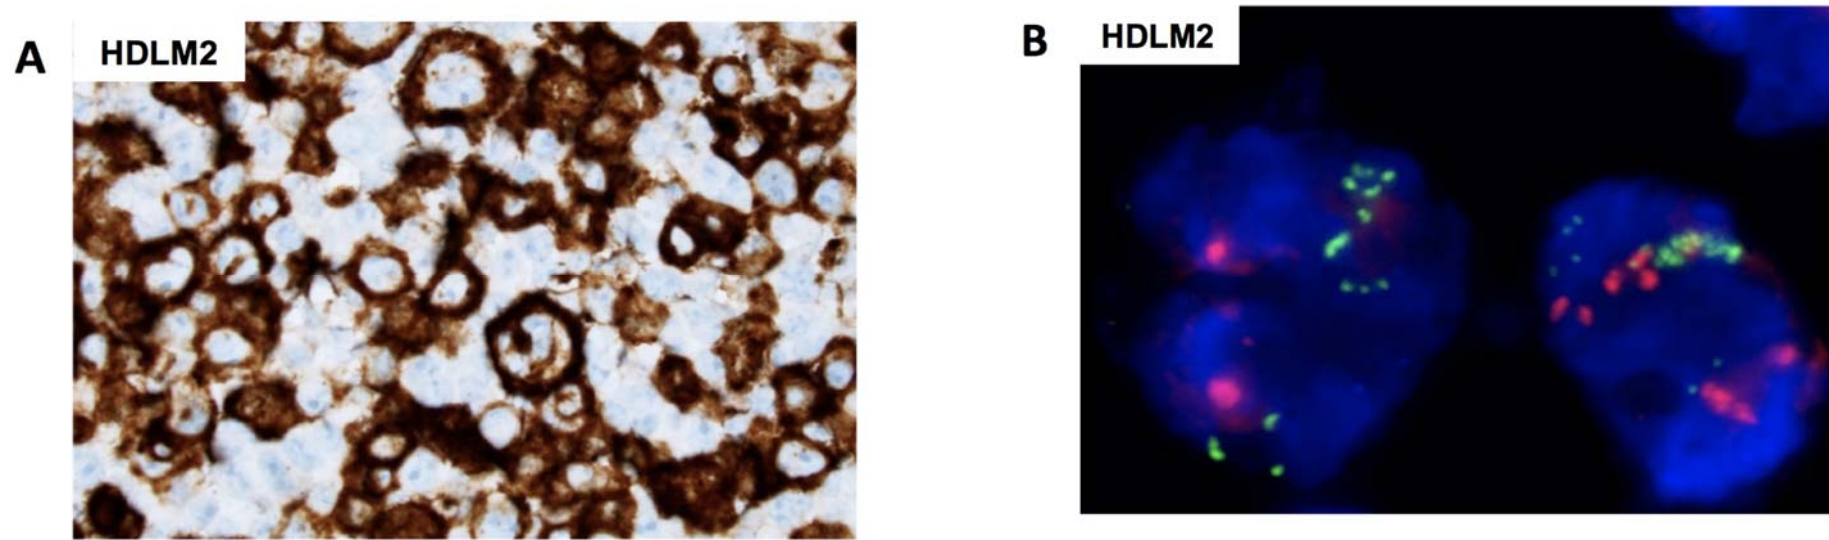

**Figure S1. Expression of PD-L1 and genetic alteration in control cell line.** **A.** High PD-L1 protein expression in immunohistochemistry on sections of FFPE cell pellets of HDLM2 Hodgkin lymphoma cell line (used as positive control). Original magnification:  $\times 200$ . **B.** Fluorescence in situ hybridization analysis for PD-L1 probe performed on HDLM2 cell blocks. The validated probe (green signal) cover the gene locus at 9p24.1. A centromeric chromosome 9 probe (CEN9, red signal) was used as a control. HDLM2 Hodgkin lymphoma cell line was used as positive control *PD-L1* gene amplification. Original magnification:  $\times 630$ .

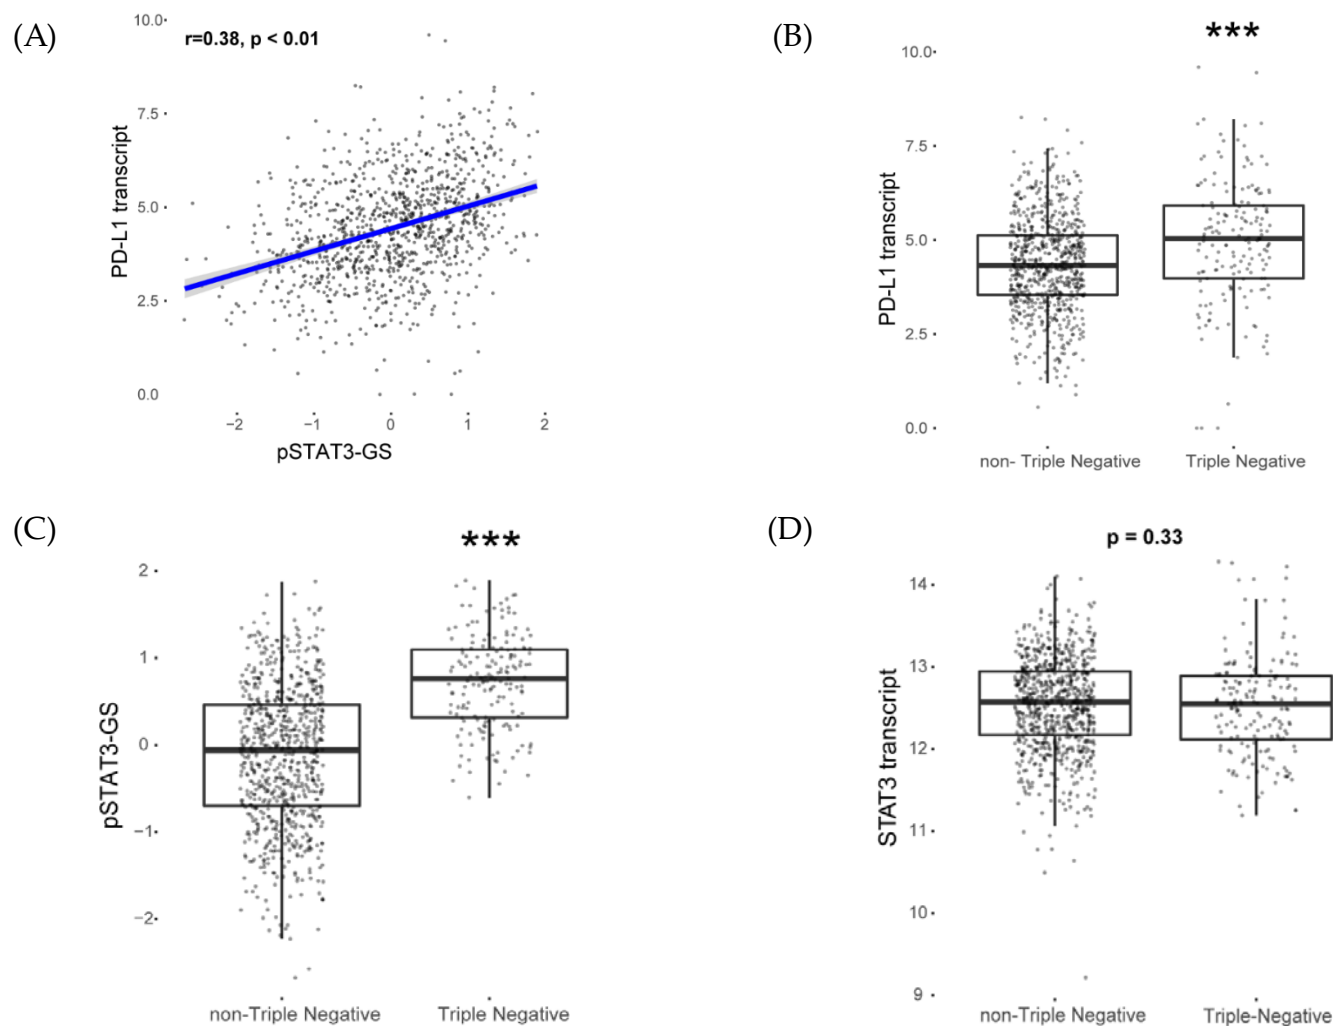

**Figure S2.** Correlation of PD-L1 transcript with pSTAT3-GS score (A) and expression patterns in TCGA Provisional database. Expression patterns of PD-L1 transcript (B), pYSTAT3-GS score (C) and STAT3 transcript (D) in triple-negative (TN) versus non-TN early breast cancer patients in TCGA Wilcoxon–Mann–Whitney test and Spearman’s rank correlation coefficient were used (\*  $p < 0.05$ ; \*\*  $p < 0.01$ ; \*\*\*  $p < 0.001$ ).

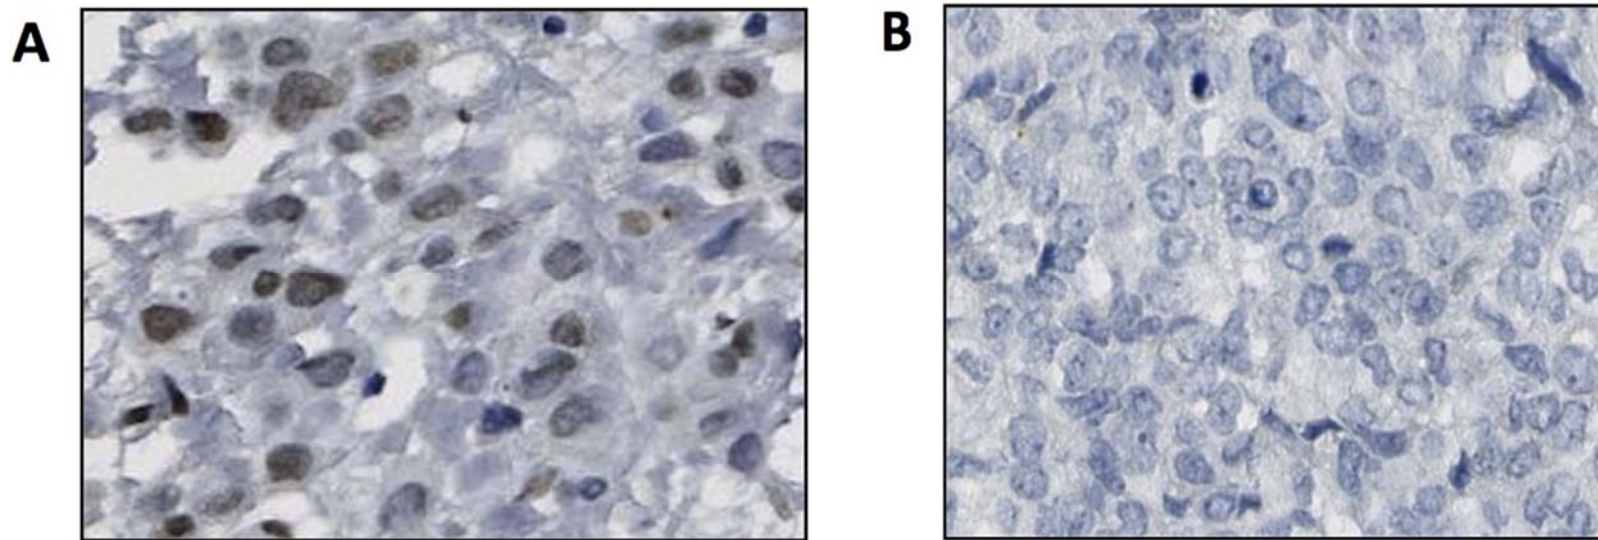

**Figure S3. Expression of pSTAT3 protein in breast cancer patients.** Immunohistochemical staining for pSTAT3 (Y705) protein was performed in a subset of patients ( $n = 83$ ). Representative photos of A. high pSTAT3 protein expression in tumor cells and B. no pSTAT3 protein expression on whole tissue sections of FFPE breast cancer patient tumors. Original magnification:  $\times 400$ .

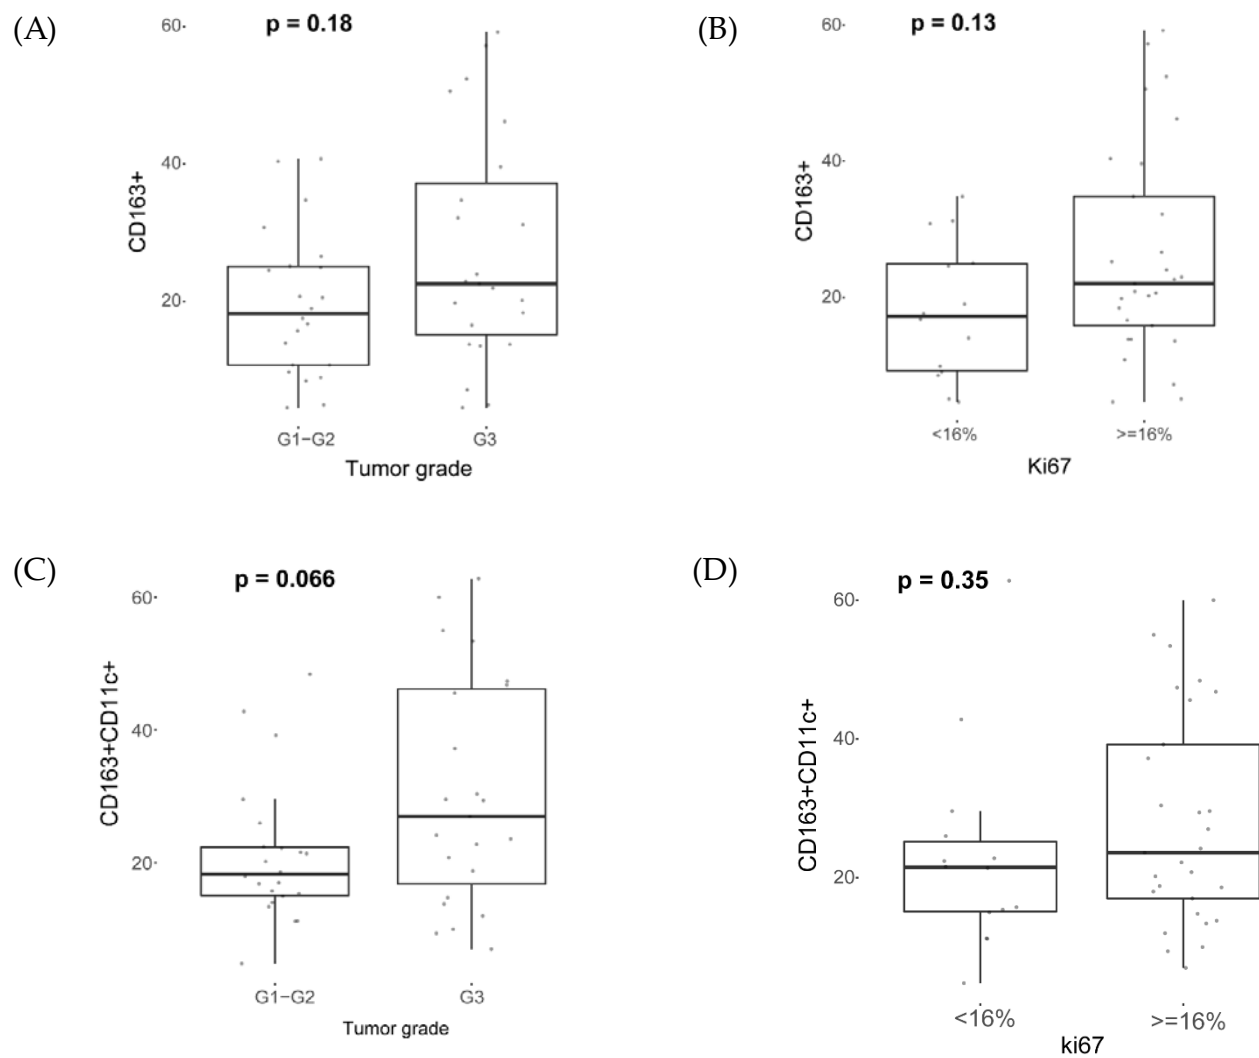

**Figure S4.** Correlations of CD163+ cell percentage (A,B) and CD163+ CD11c+ cell percentage (C,D) with tumor grade and proliferation status (Ki67) in human breast cancer patients. Wilcoxon–Mann–Whitney test was used (\*  $p < 0.05$ ; \*\*  $p < 0.01$ ; \*\*\*  $p < 0.001$ ).

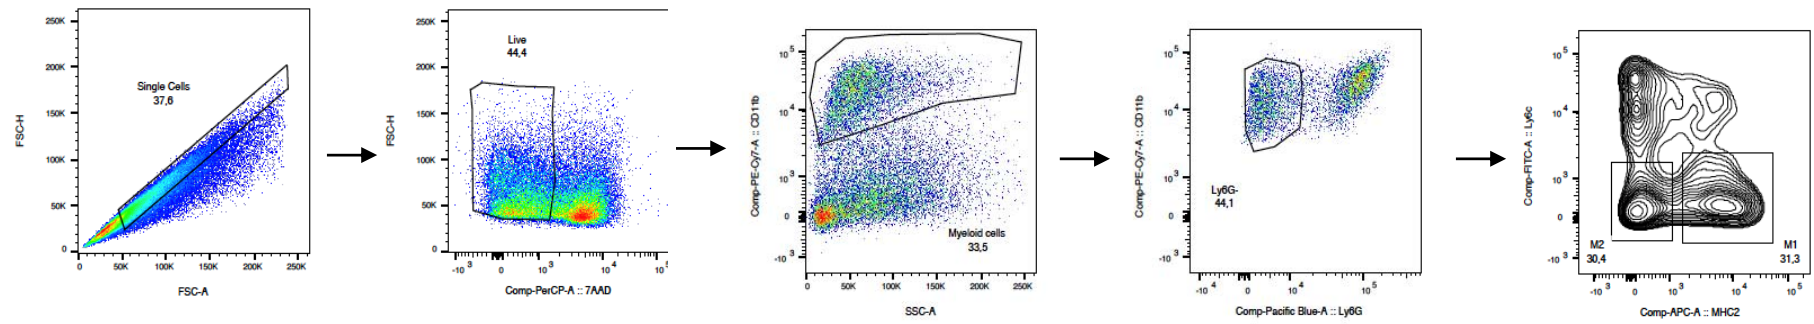

Figure S5. Gating strategies for macrophage panel MHC class II.



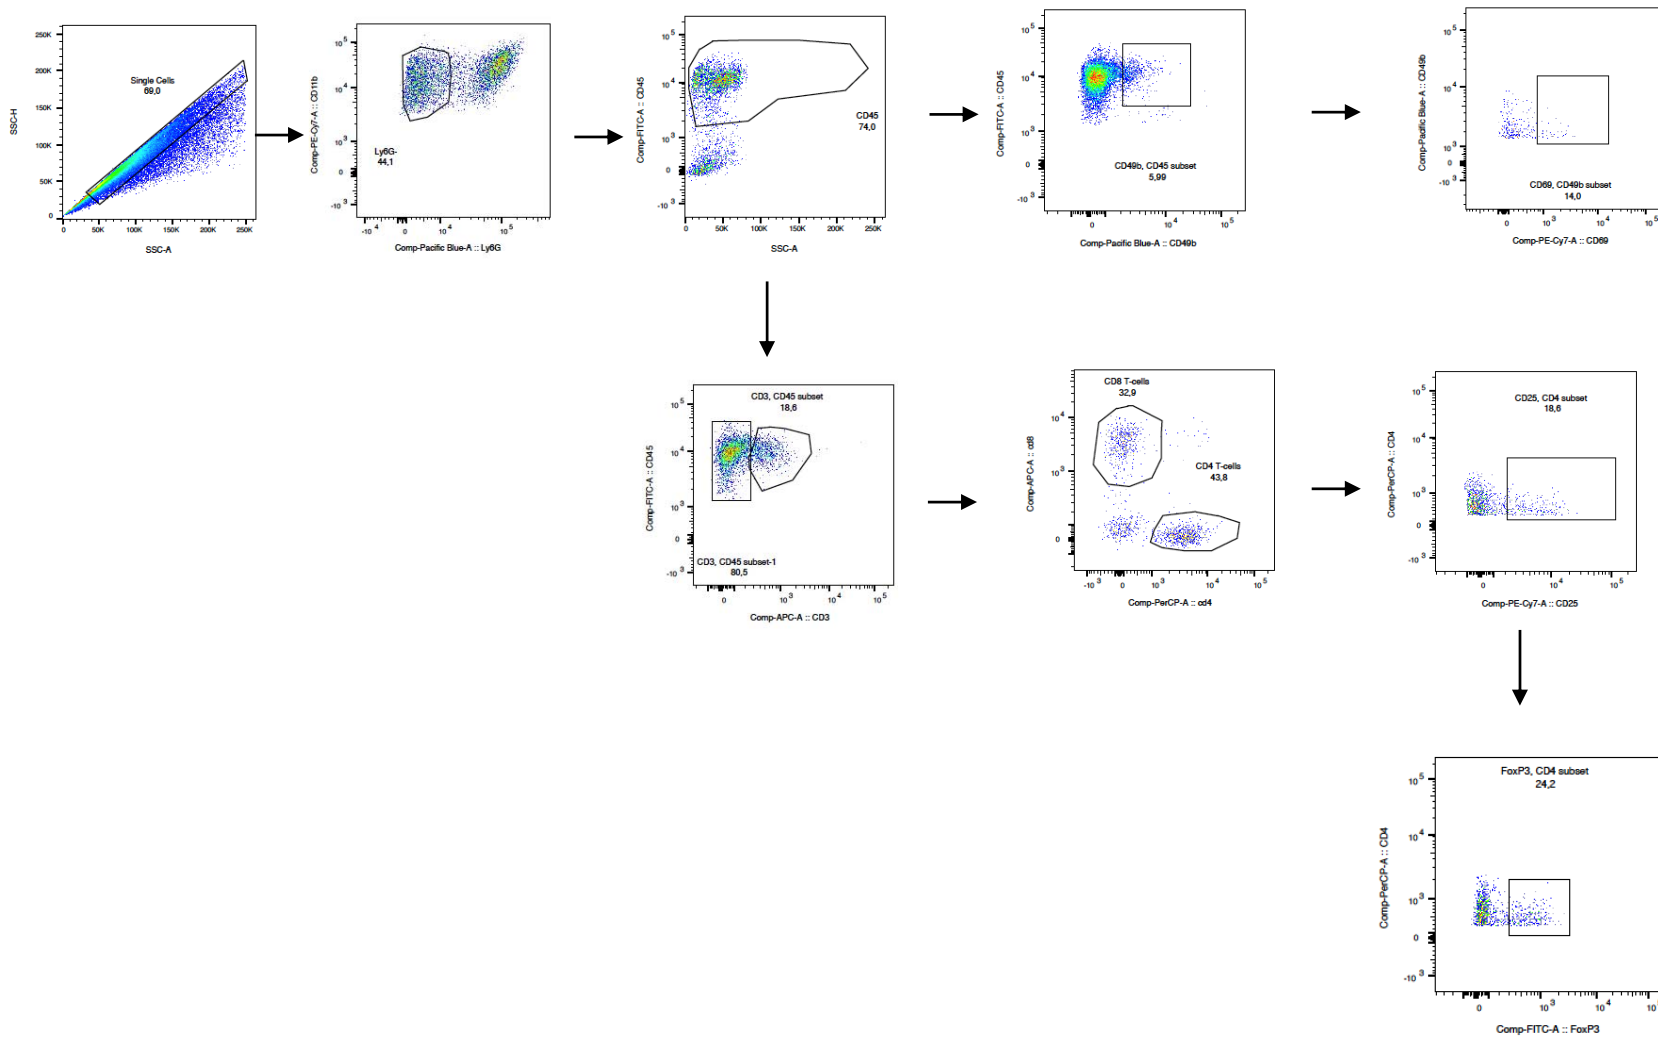

Figure S6. Gating strategies for lymphocytic panel.

Western blots corresponding to Fig. 1A

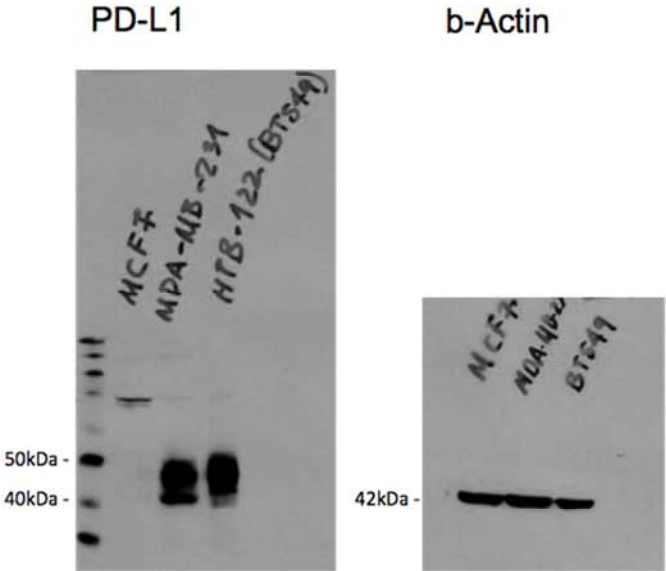

Western blots corresponding to Fig. 1B

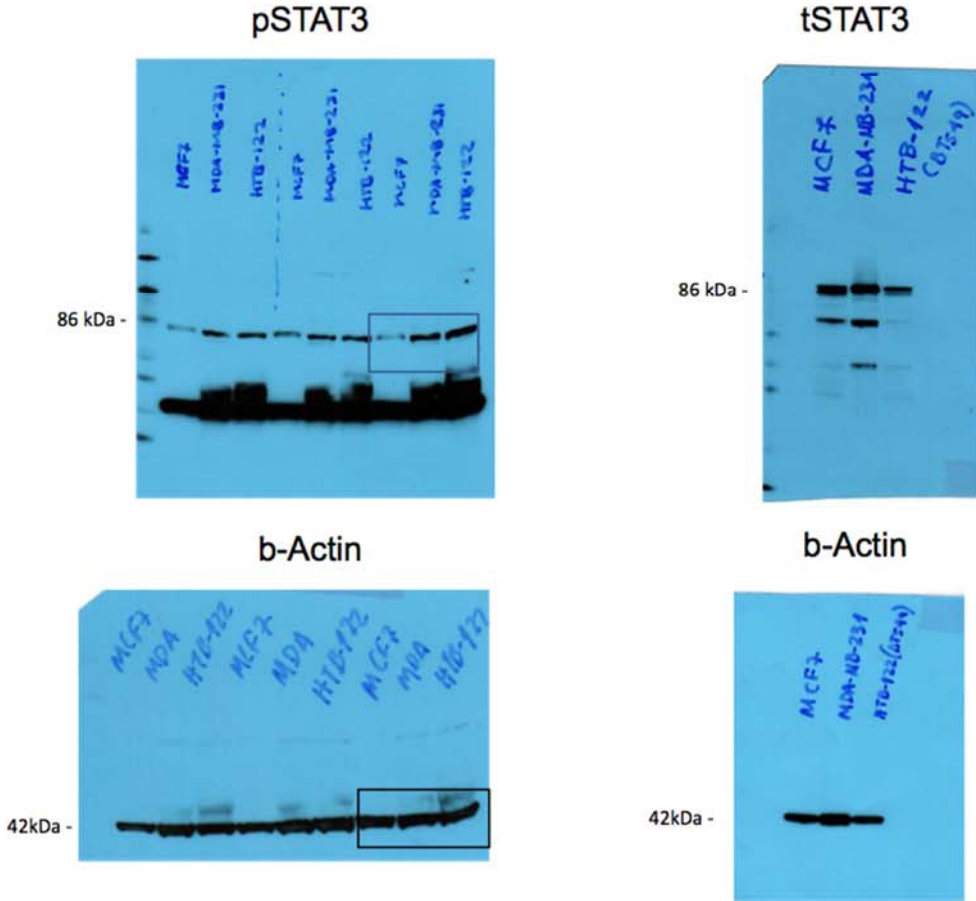

### Western blots corresponding to Fig. 2D

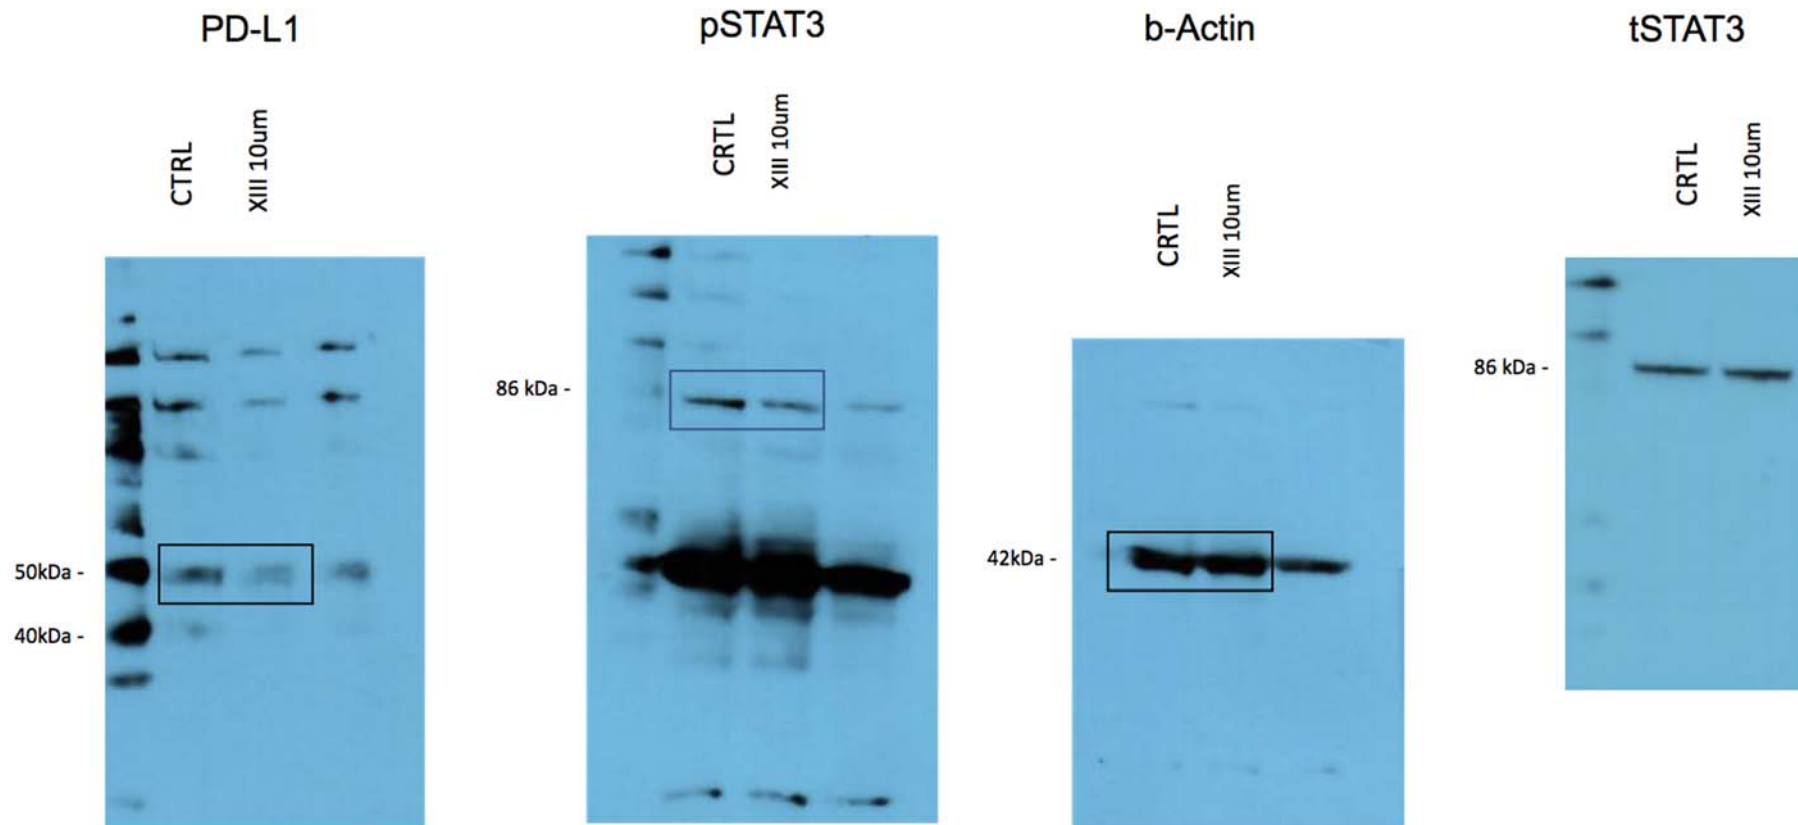

**Western blots corresponding to Fig. 2E**

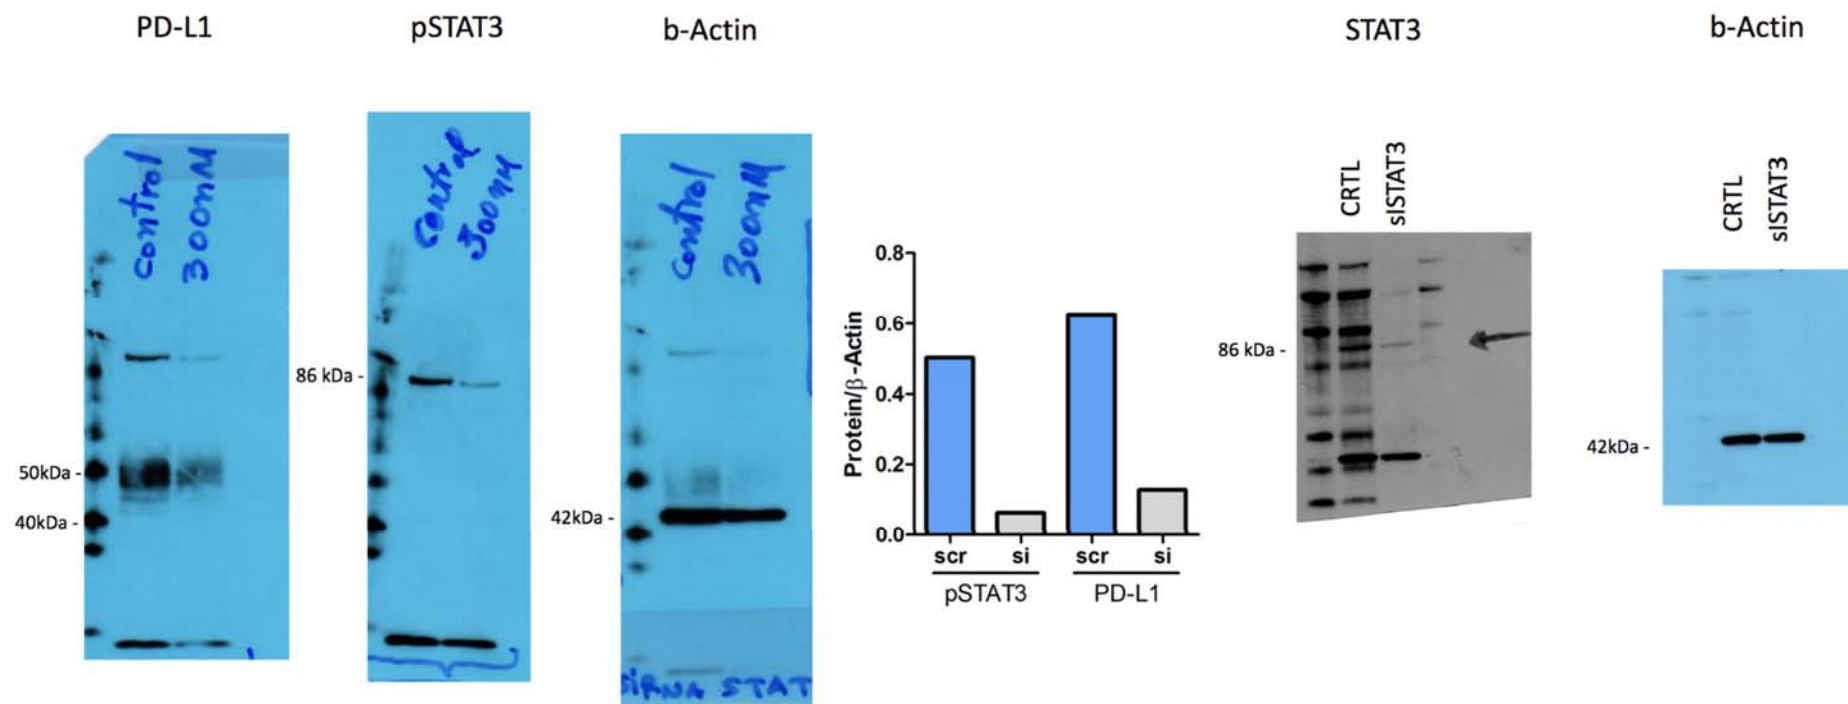

### Western blots corresponding to Fig. 2F

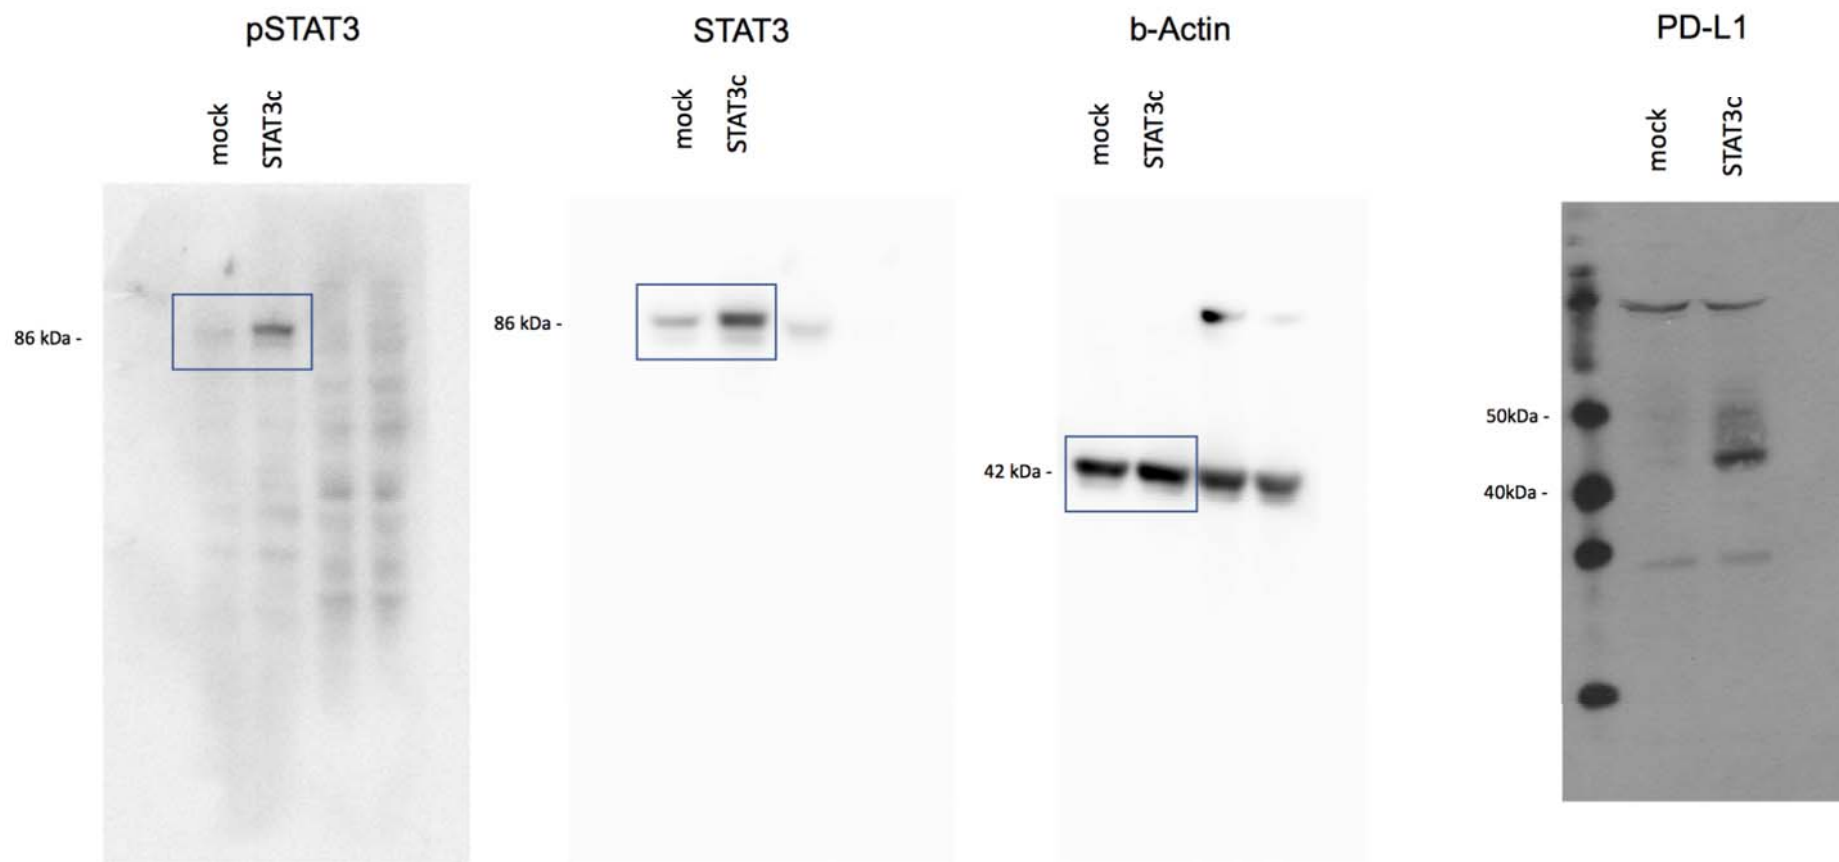

### Western blots corresponding to Fig. 2H

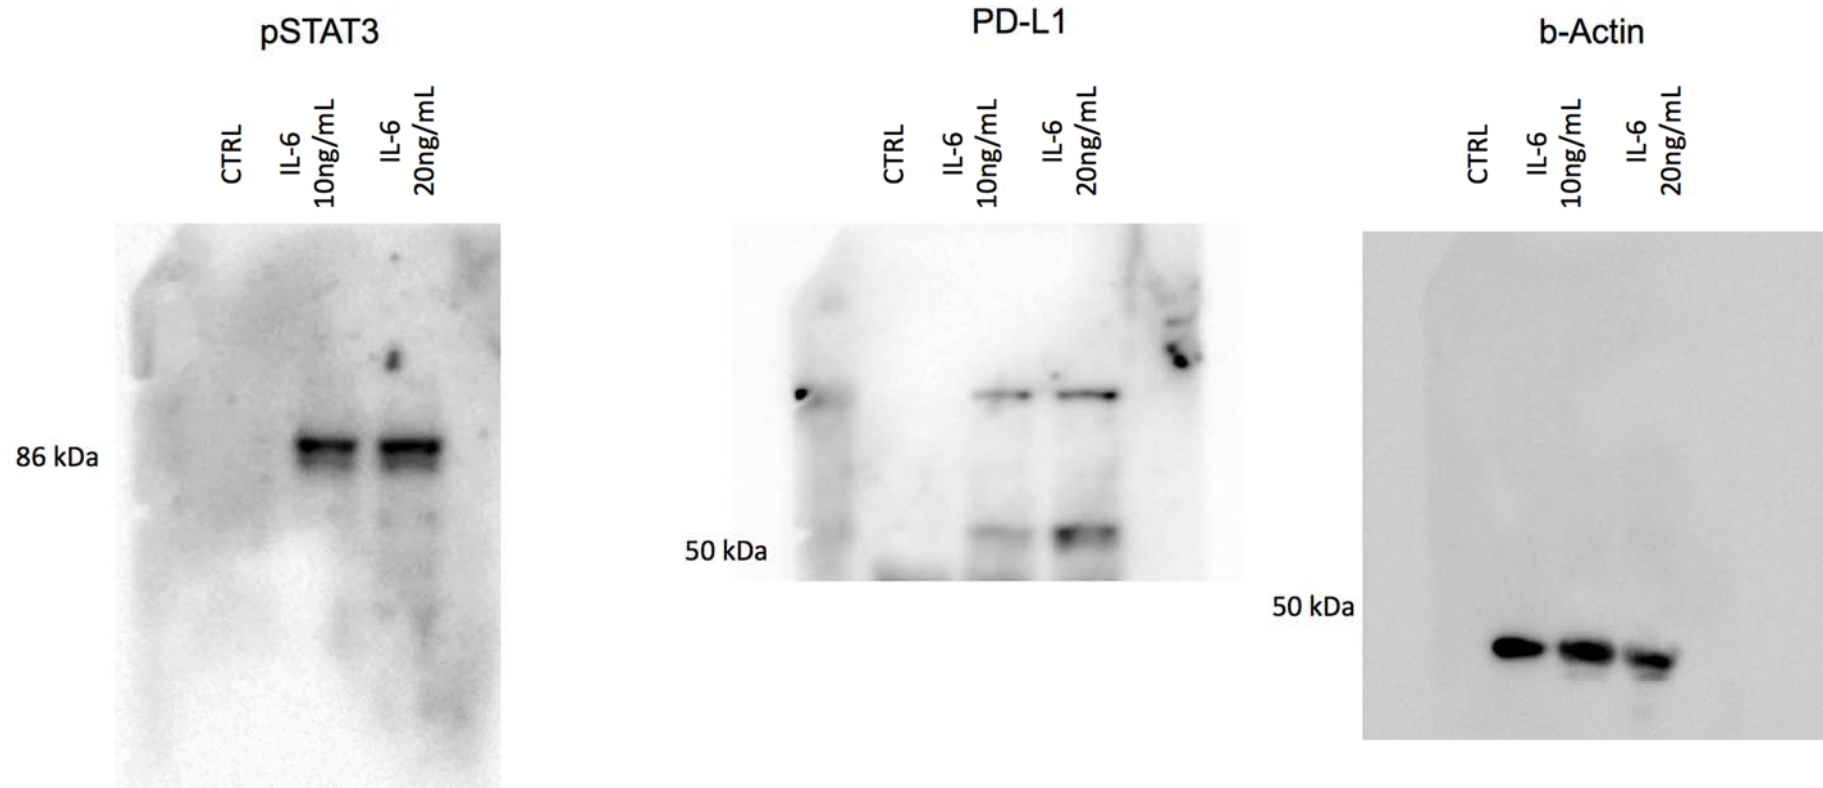

### Western blots corresponding to Fig. 3B

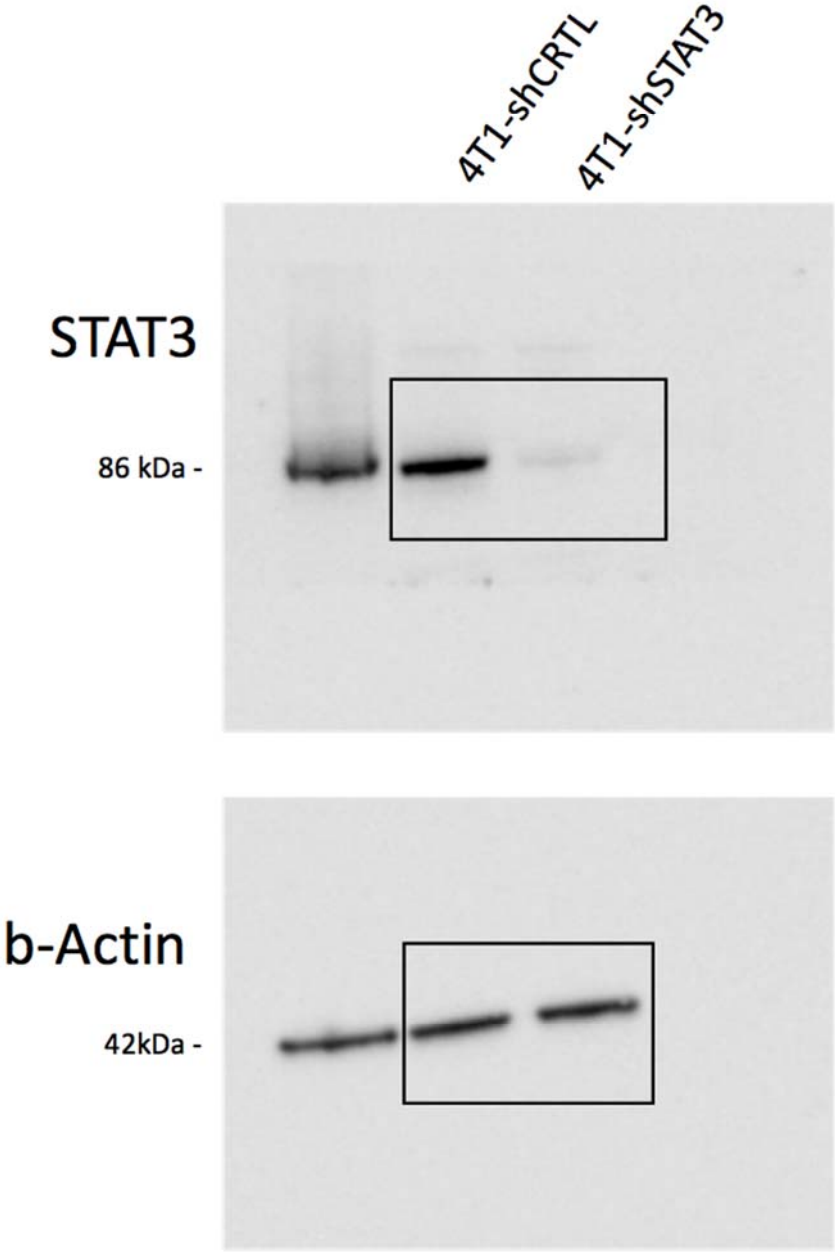

Supplement: cancers-11-01479-s001.pdf [file cancers-11-01479-s001.pdf]
