# Supplementary material for: STAT3 Activity Promotes Programmed-Death Ligand 1 Expression and Suppresses Immune Responses in Breast Cancer
Source: MDPI journal article supplement (doi:10.3390/cancers11101479), 2019-10-01

# STAT3 promotes Programmed-Death Ligand 1 expression suppressing immune responses in breast cancer

Ioannis Zerdas, Majken Wallerius, Emmanouil G. Sifakis, Tatjana Wallmann, Stina Betts, Margarita Bartish, Nikolaos Tsesmetzis, Nicholas P. Tobin, Christos Coucoravas, Jonas Bergh, George Z. Rassidakis, Charlotte Rolny and Theodoros Foukakis

**Table S1.** List of cancer cell lines used in the study.

| Cell Line               | Tissue               | Organism | Disease                             | Comments                                                                                 |
|-------------------------|----------------------|----------|-------------------------------------|------------------------------------------------------------------------------------------|
| MCF7 <sup>1</sup>       | Mammary gland/breast | Human    | Adenocarcinoma                      | Luminal                                                                                  |
| MDA-MB-231 <sup>1</sup> | Mammary gland/breast | Human    | Adenocarcinoma                      | Triple-negative                                                                          |
| BT549 <sup>1</sup>      | Mammary gland/breast | Human    | Ductal carcinoma                    | Triple-negative                                                                          |
| SKRB3 <sup>2</sup>      | Mammary gland/breast | Human    | Adenocarcinoma                      | ER-/PR-/HER2+                                                                            |
| 4T1 <sup>3</sup>        | Mammary gland/breast | Mouse    | Animal stage IV human breast cancer | Originated from tumors developed in BALB/cfC3H mouse; highly metastatic; Triple-negative |
| MAC2A <sup>4</sup>      | Lymphoid             | Human    | Anaplastic large cell lymphoma      | ALK - negative                                                                           |
| HDLM2 <sup>5</sup>      | Lymphoid             | Human    | Hodgkin lymphoma                    | -                                                                                        |

<sup>1</sup> Purchased from ATCC, USA; <sup>2</sup> A gift from Dan Grander's lab (Karolinska Institute, Stockholm, Sweden); <sup>3</sup> Purchased from Karmanos Cancer Institute, Wayne State University, USA; <sup>4</sup> A gift from Dr. Marshal Kadin (Boston, MA, USA); <sup>5</sup> Purchased from DSMZ, Germany; **Abbreviations:** ER, estrogen receptor; PR, progesterone receptor; HER2, human epidermal growth factor receptor 2; ALK, Anaplastic Lymphoma Kinase.

**Table S2.** List of antibodies used in the study.

| Antibody                     | Cat. no   | Species              | Company                   | Method(s)         |
|------------------------------|-----------|----------------------|---------------------------|-------------------|
| STAT3                        | #4904     | Rabbit (79D7)        | Cell Signaling Technology | Western blot      |
| pSTAT3 (Y705)                | sc-8059   | Mouse (B-7)          | Santa Cruz Biotechnology  | Western blot, IHC |
| pSTAT3 (Y705)                | #9145     | Rabbit (D3A7)        | Cell Signaling Technology | Western blot, IHC |
| PD-L1                        | #13684    | Rabbit (E1L3N)       | Cell Signaling Technology | Western blot, IHC |
| PD-L1                        | #740-4859 | Rabbit (clone SP263) | Ventana (Roche)           | IHC               |
| b- actin                     | A5441     | Mouse                | Sigma-Aldrich             | Western blot      |
| Anti-rabbit IgG (HRP-linked) | #7074     | Goat                 | Cell Signaling Technology | Western blot      |

| Anti-mouse<br>IgG<br>(HRP-<br>linked) | #7076                | Horse              | Cell Signaling<br>Technology | Western blot |
|---------------------------------------|----------------------|--------------------|------------------------------|--------------|
| Anti-biotin<br>(HRP-<br>linked)       | #7075                | Goat               | Cell Signaling<br>Technology | Western blot |
| Antibodies                            | Company              | Method             |                              |              |
| CD163                                 | Leica                |                    |                              |              |
| CD11c                                 |                      |                    |                              |              |
| AlexaFluor 488                        | Life<br>Technologies | Immunofluorescence |                              |              |
| AlexaFluor 546                        |                      |                    |                              |              |
| DAPI                                  | Invitrogen Corp      |                    |                              |              |
| Antibodies                            | Company              | Method             |                              |              |
| CD11b (M1/70)                         | BD Bioscience        | Flow cytometry     |                              |              |
| CD45 (30-F11)                         |                      |                    |                              |              |
| Ly6C (AL-21)                          |                      |                    |                              |              |
| Ly6G (1A8)                            |                      |                    |                              |              |
| CD86 (GL1)                            |                      |                    |                              |              |
| CD11c (HL3)                           |                      |                    |                              |              |
| CD3 (500A2/145-2c11)                  |                      |                    |                              |              |
| CD8 (53-6.7)                          |                      |                    |                              |              |
| CD4 (RM4-5)                           |                      |                    |                              |              |
| CD69 (H1.2F3)                         |                      |                    |                              |              |
| CD49b (HM ALPHA2)                     |                      |                    |                              |              |
| MHC class II (I-A/I-E)                |                      |                    |                              |              |
| MHC class I (H-2K(d))                 |                      |                    |                              |              |
| CD25 (PC61)                           |                      |                    |                              |              |
| FoxP3 (MF23)                          |                      |                    |                              |              |
| F4/80 (BM8)                           | BioLegend            | Flow cytometry     |                              |              |
| MRC1 (C068C2)                         |                      |                    |                              |              |
| CD8a (53-6.7)                         |                      |                    |                              |              |
| CD279 (29F.1A12)                      |                      |                    |                              |              |
| CD274 (10F.9G2)                       |                      |                    |                              |              |

**Table S3.** List of primers, siRNA and shRNA target sequences used in the study.

| Gene                                                                | Sequence (5'- 3')                                                                      | Company                                                | Method                                   |
|---------------------------------------------------------------------|----------------------------------------------------------------------------------------|--------------------------------------------------------|------------------------------------------|
| <i>PD-L1</i><br>(human)                                             | Forward: CTCCAAATGAAAGGACTCAC<br>Reverse: TCCCTTTTTCTTAAACGGAAG                        | Sigma-<br>Aldrich                                      | RT-qPCR                                  |
| <i>b-actin</i><br>(human)                                           | Forward: GACGACATGGAGAAAATCTG<br>Reverse: ATGATCTGGGTCATCTTCTC                         | Sigma-<br>Aldrich                                      | RT-qPCR                                  |
| <i>pd-l1</i><br>(mouse)                                             | Forward: CAAGTGAGAATGCTAGATGTG<br>Reverse: TCCATCTTGAGTCTTTGGAC                        | Sigma-<br>Aldrich                                      | RT-qPCR                                  |
| <i>18S</i><br><i>rRNA</i><br>(mouse)                                | Forward: TTCCTTACCTGGTTGATCCTGCC<br>Reverse: AGCCATTGCGAGTTTCACTGTAC                   | Sigma-<br>Aldrich                                      | RT-qPCR                                  |
| siRNA<br><i>STAT3</i><br>(human)                                    | GAGAUUGACCAGCAGUAUA                                                                    | Dharmaco<br>n <sup>TM</sup><br>(Lafayette,<br>CO, USA) | Transient<br>transfectio<br>n            |
| shRNA<br><i>Stat3</i><br>(mouse)<br>MISSION <sup>®</sup><br>Plasmid | NM_011486.3.1238s1c1<br>CCGGCCTGAGTTGAATTATCAGCTTCTCGAGAAGCTGATAATTCAACT<br>CAGGTTTTTG | Sigma-<br>Aldrich                                      | Lentiviral<br>vector<br>transducti<br>on |

**Abbreviations:** siRNA, small interfering RNA; shRNA, small hairpin RNA; RT-qPCR, real-time quantitative polymerase chain reaction.

**Table S4.** Correlation of PD-L1 protein expression in tumor, immune and total cells\* with pSTAT3 protein expression in human breast cancer patients. Fisher's exact test was used for the statistical analyses. (\* either tumor or immune cells).

|                    | PD-L1 IHC Expression in Tumor Cells |          |                 | PD-L1 IHC Expression in Immune Cells |          |                 | PD-L1 IHC Expression in Total Cells |          |                 |
|--------------------|-------------------------------------|----------|-----------------|--------------------------------------|----------|-----------------|-------------------------------------|----------|-----------------|
|                    | Positive                            | Negative | <i>p</i> -Value | Positive                             | Negative | <i>p</i> -Value | Positive                            | Negative | <i>p</i> -Value |
| pSTAT3-high (n=41) | 22                                  | 19       | 0.66            | 24                                   | 17       | 0.08            | 26                                  | 15       | 0.19            |
| pSTAT3-low (n=42)  | 20                                  | 22       |                 | 16                                   | 26       |                 | 20                                  | 22       |                 |

**Table S5.** Correlation of PD-L1 protein expression in tumor cells with grade and Ki67 status in human breast cancer patients.

|           | PD-L1 IHC expression in tumor cells |                 |                  |
|-----------|-------------------------------------|-----------------|------------------|
|           | Positive (n=23)                     | Negative (n=22) | <i>p</i> -value* |
| Grade 1-2 | 4                                   | 18              | 1.982e-05        |
| Grade 3   | 19                                  | 4               |                  |
| Ki67 <16% | 2                                   | 12              | 0.00106          |
| Ki67 ≥16% | 20                                  | 9               |                  |

\* Fisher's exact test. For Ki67, there was one patient with unknown status.

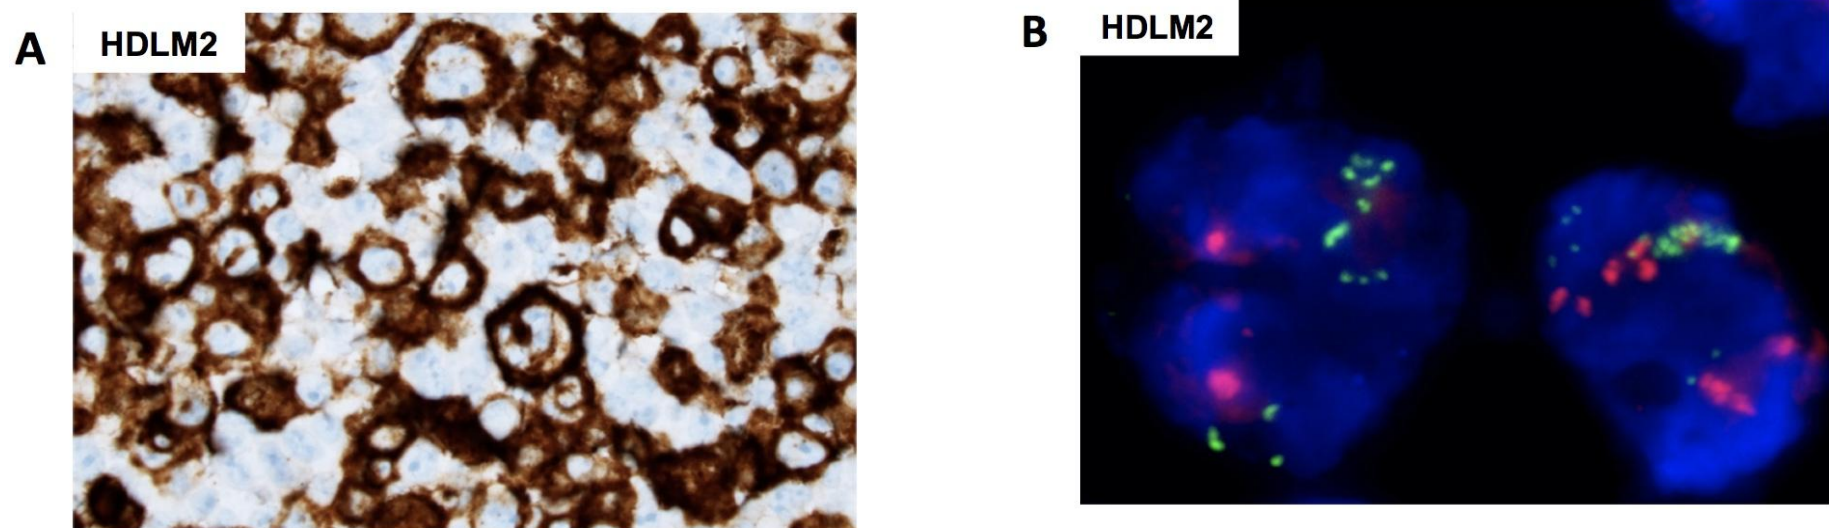

**Figure S1. Expression of PD-L1 and genetic alteration in control cell line.** **A.** High PD-L1 protein expression in immunohistochemistry on sections of FFPE cell pellets of HDLM2 Hodgkin lymphoma cell line (used as positive control). Original magnification: x200. **B.** Fluorescence in situ hybridization analysis for PD-L1 probe performed on HDLM2 cell blocks. The validated probe (green signal) cover the gene locus at 9p24.1. A centromeric chromosome 9 probe (CEN9, red signal) was used as a control. HDLM2 Hodgkin lymphoma cell line was used as positive control *PD-L1* gene amplification. Original magnification: x630.

**Figure S2.** Correlation of PD-L1 transcript with pSTAT3-GS score (A) and expression patterns in TCGA Provisional database. Expression patterns of PD-L1 transcript (B), pYSTAT3-GS score (C) and STAT3 transcript (D) in triple-negative (TN) versus non-TN early breast cancer patients in TCGA Wilcoxon–Mann–Whitney test and Spearman’s rank correlation coefficient were used (\*,  $p < 0.05$ ; \*\*,  $p < 0.01$ ; \*\*\*,  $p < 0.001$ ).

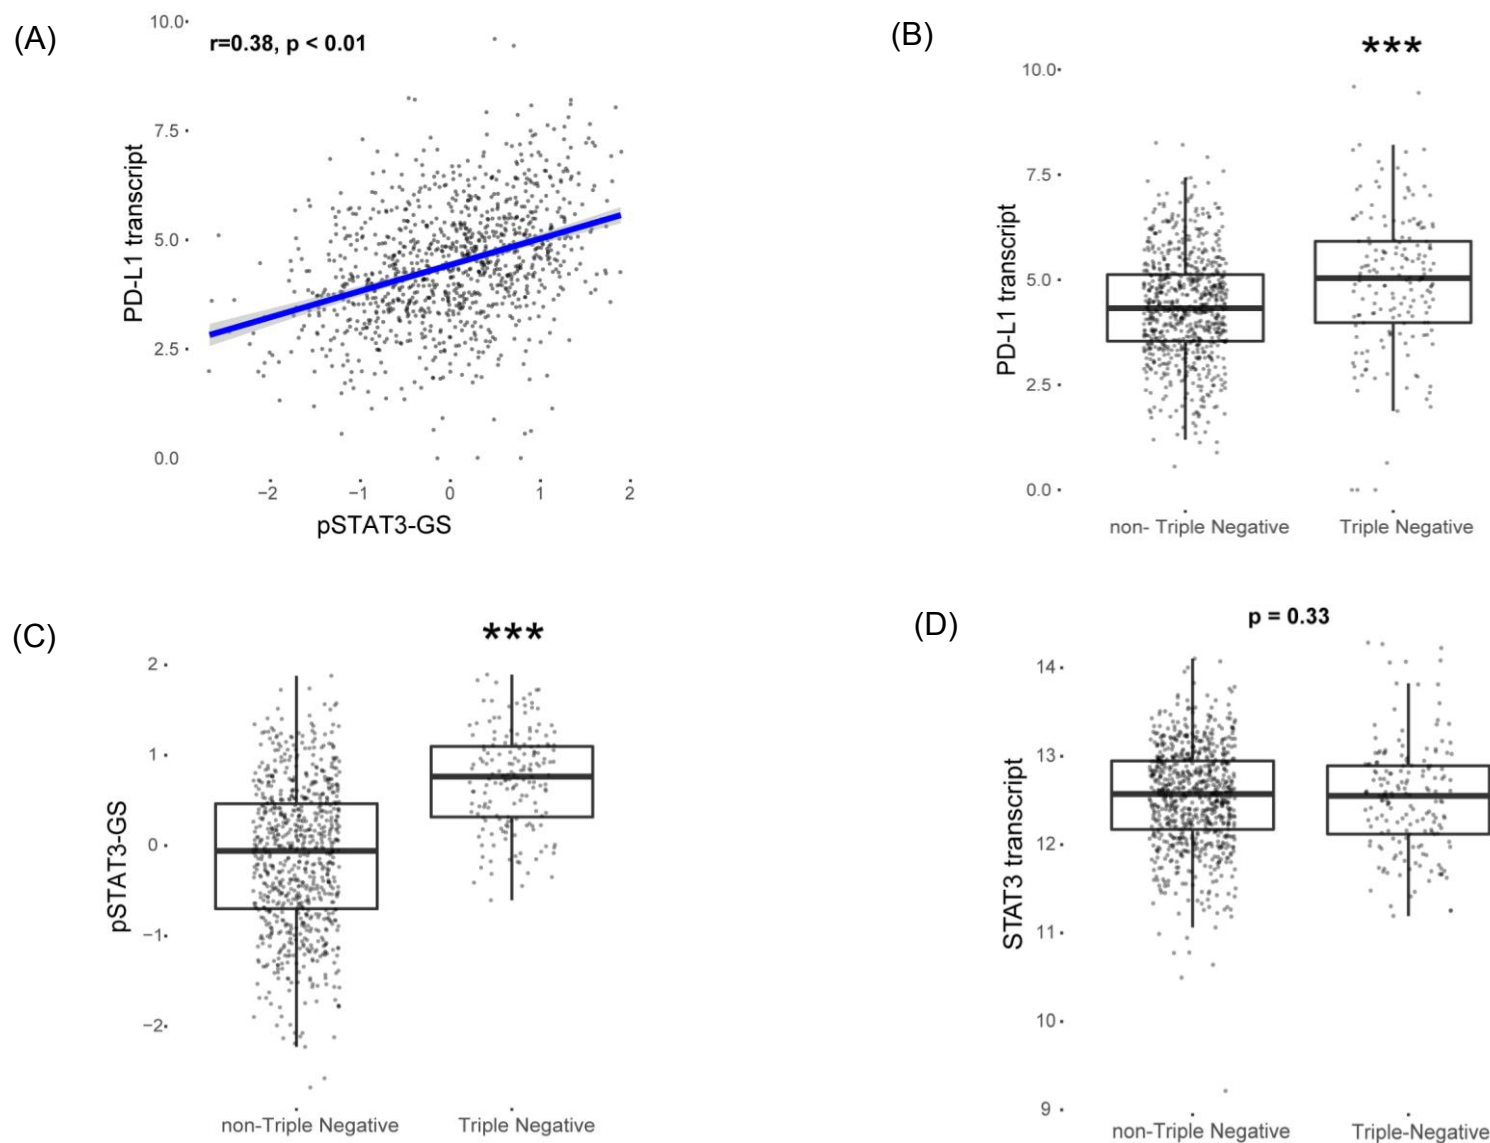

**Figure S3. Expression of pSTAT3 protein in breast cancer patients.** Immunohistochemical staining for pSTAT3 (Y705) protein was performed in a subset of patients (n=83). Representative photos of A. high pSTAT3 protein expression in tumor cells and B. no pSTAT3 protein expression on whole tissue sections of FFPE breast cancer patient tumors. Original magnification: x400.

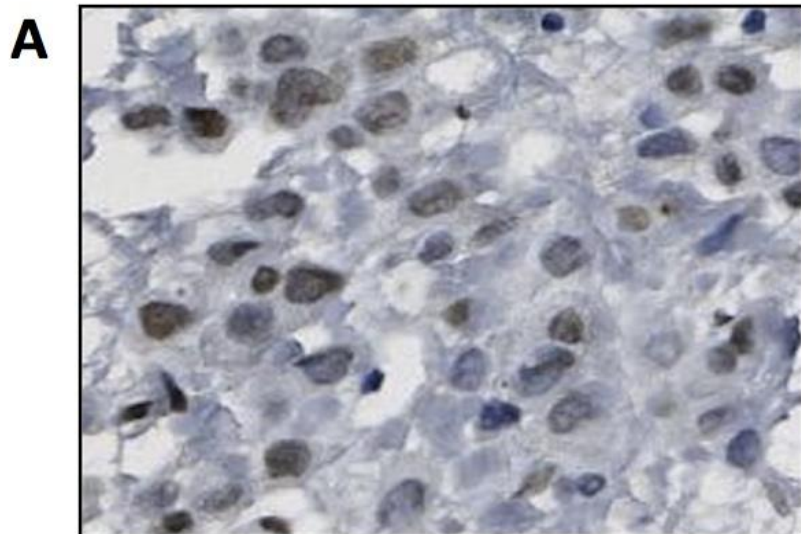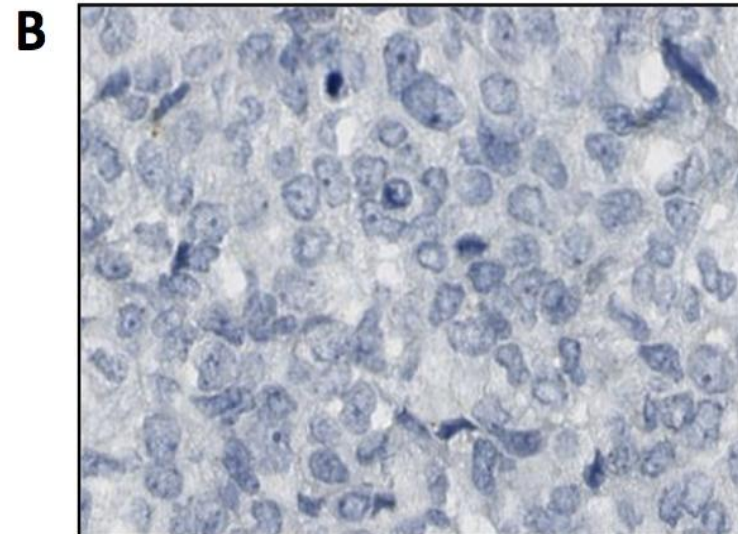

**Figure S4.** Correlations of CD163+ cell percentage (A, B) and CD163+ CD11c+ cell percentage (C,D) with tumor grade and proliferation status (Ki67) in human breast cancer patients. Wilcoxon–Mann–Whitney test was used (\*,  $p < 0.05$ ; \*\*,  $p < 0.01$ ; \*\*\*,  $p < 0.001$ ).

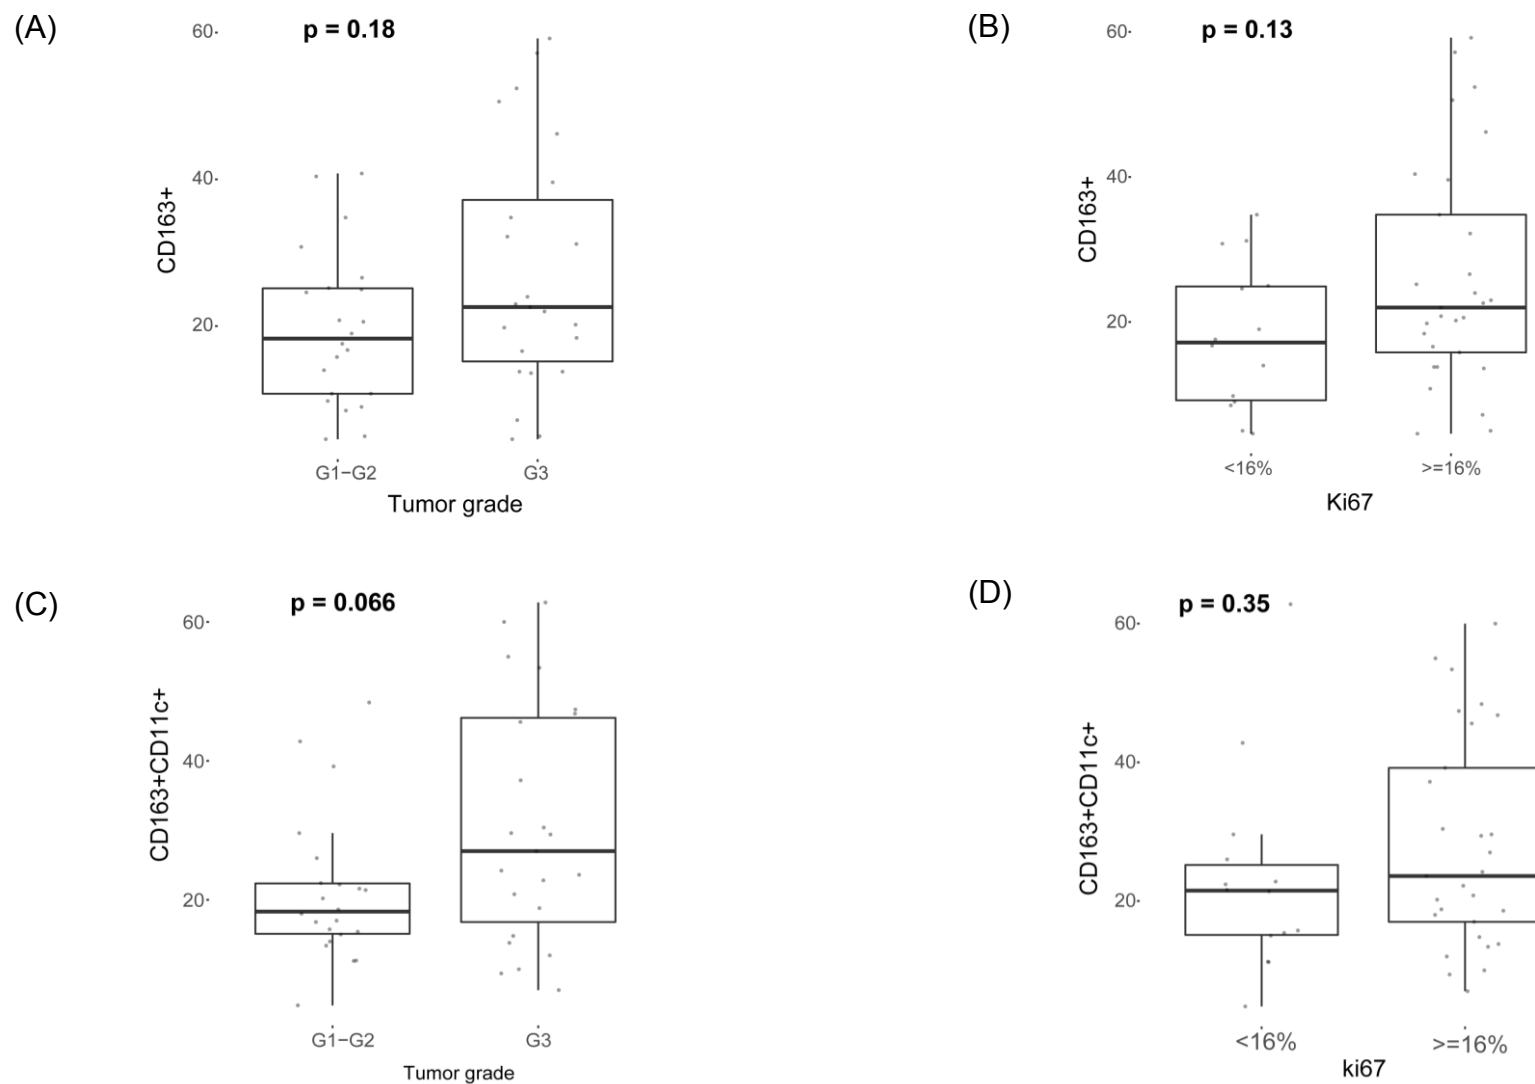

**Figure S5.** Gating strategies for macrophage panel MHC class II.

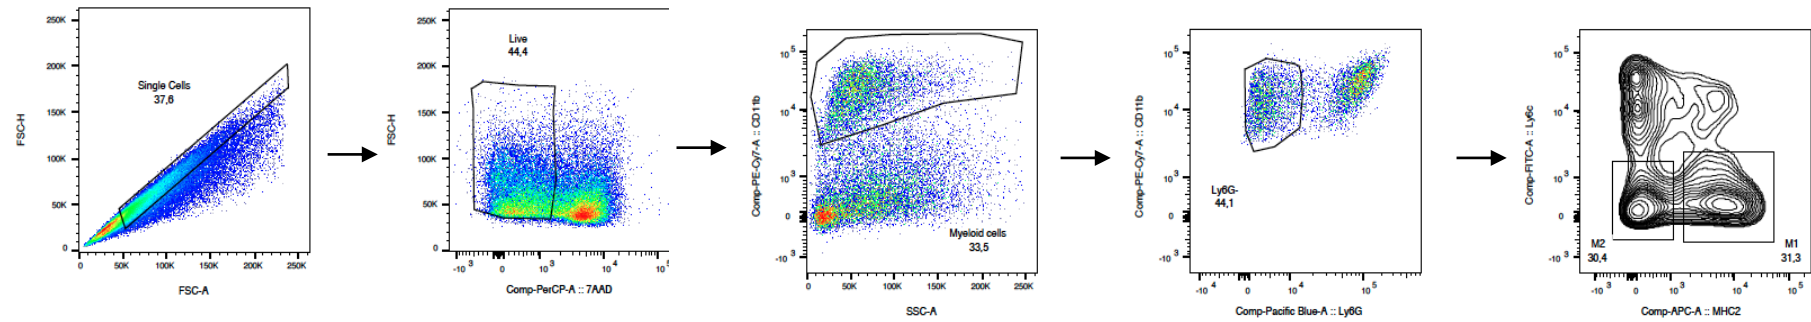



Figure S6. Gating strategies for lymphocytic panel.

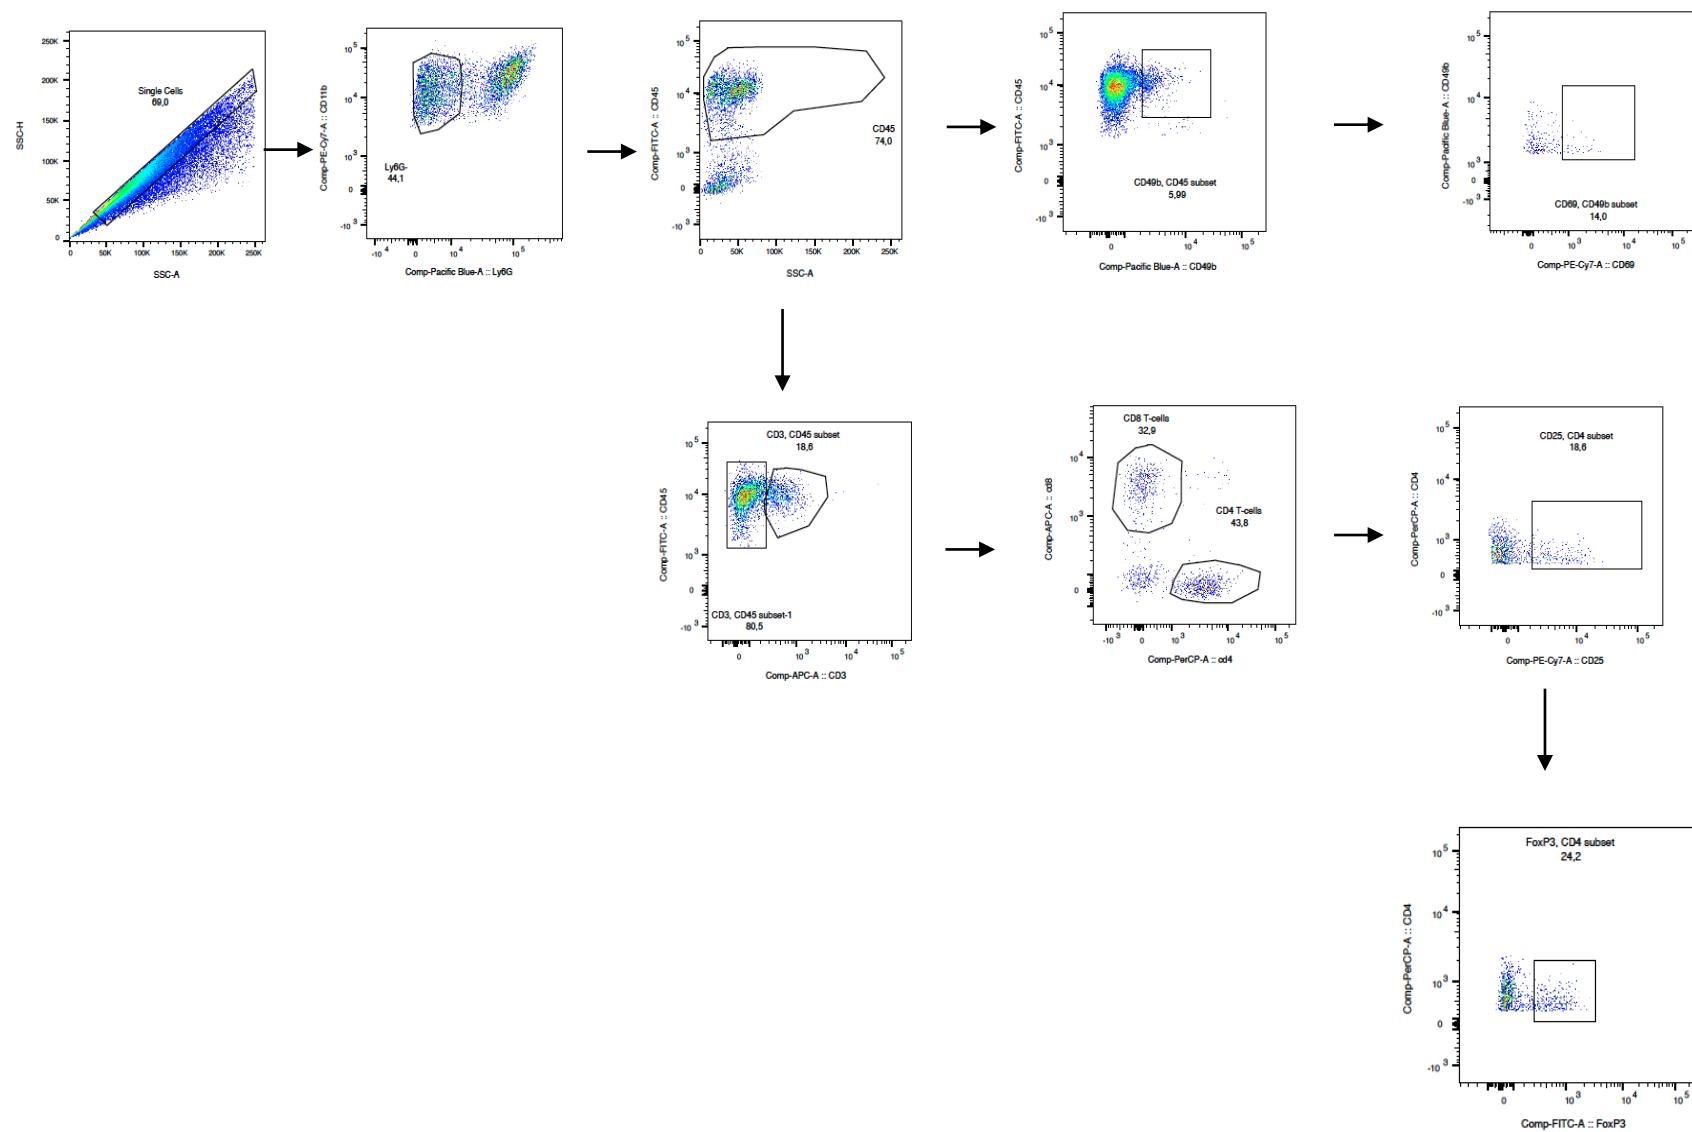

Western blots corresponding to Fig. 1A

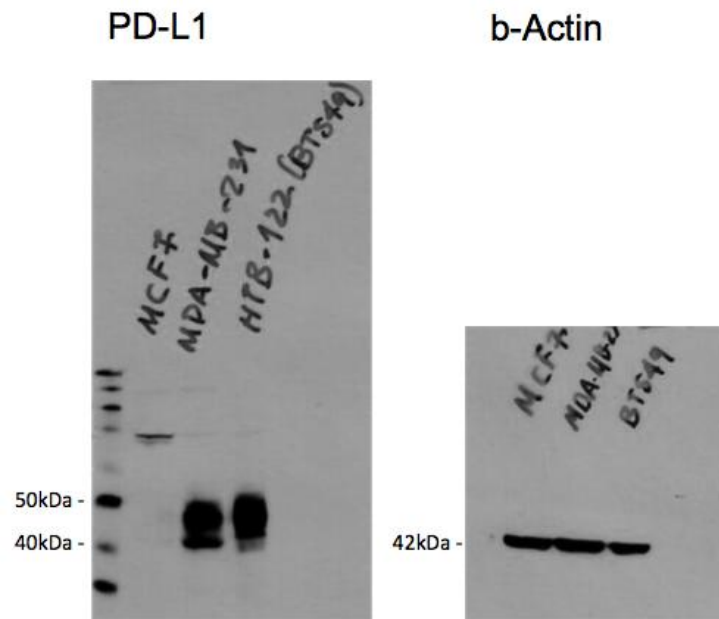

Western blots corresponding to Fig. 1B

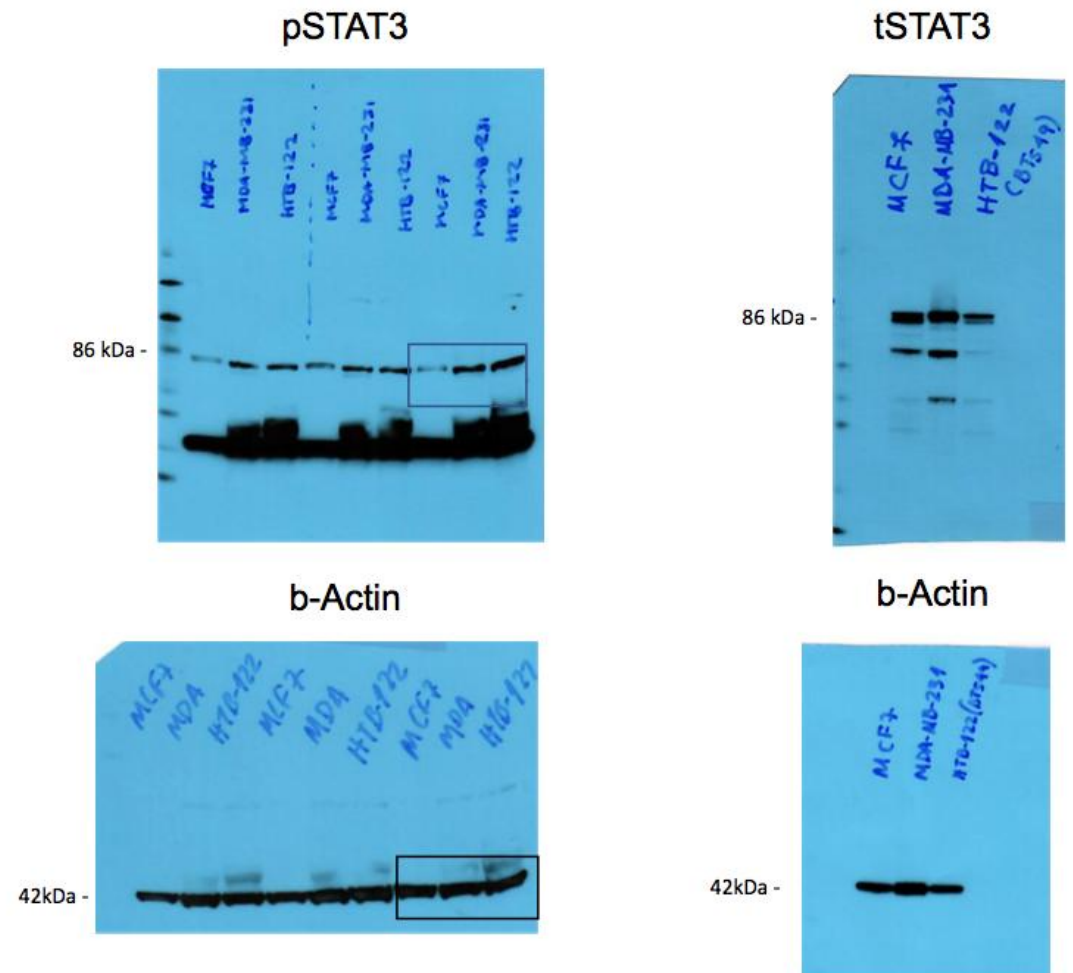

## Western blots corresponding to Fig. 2D

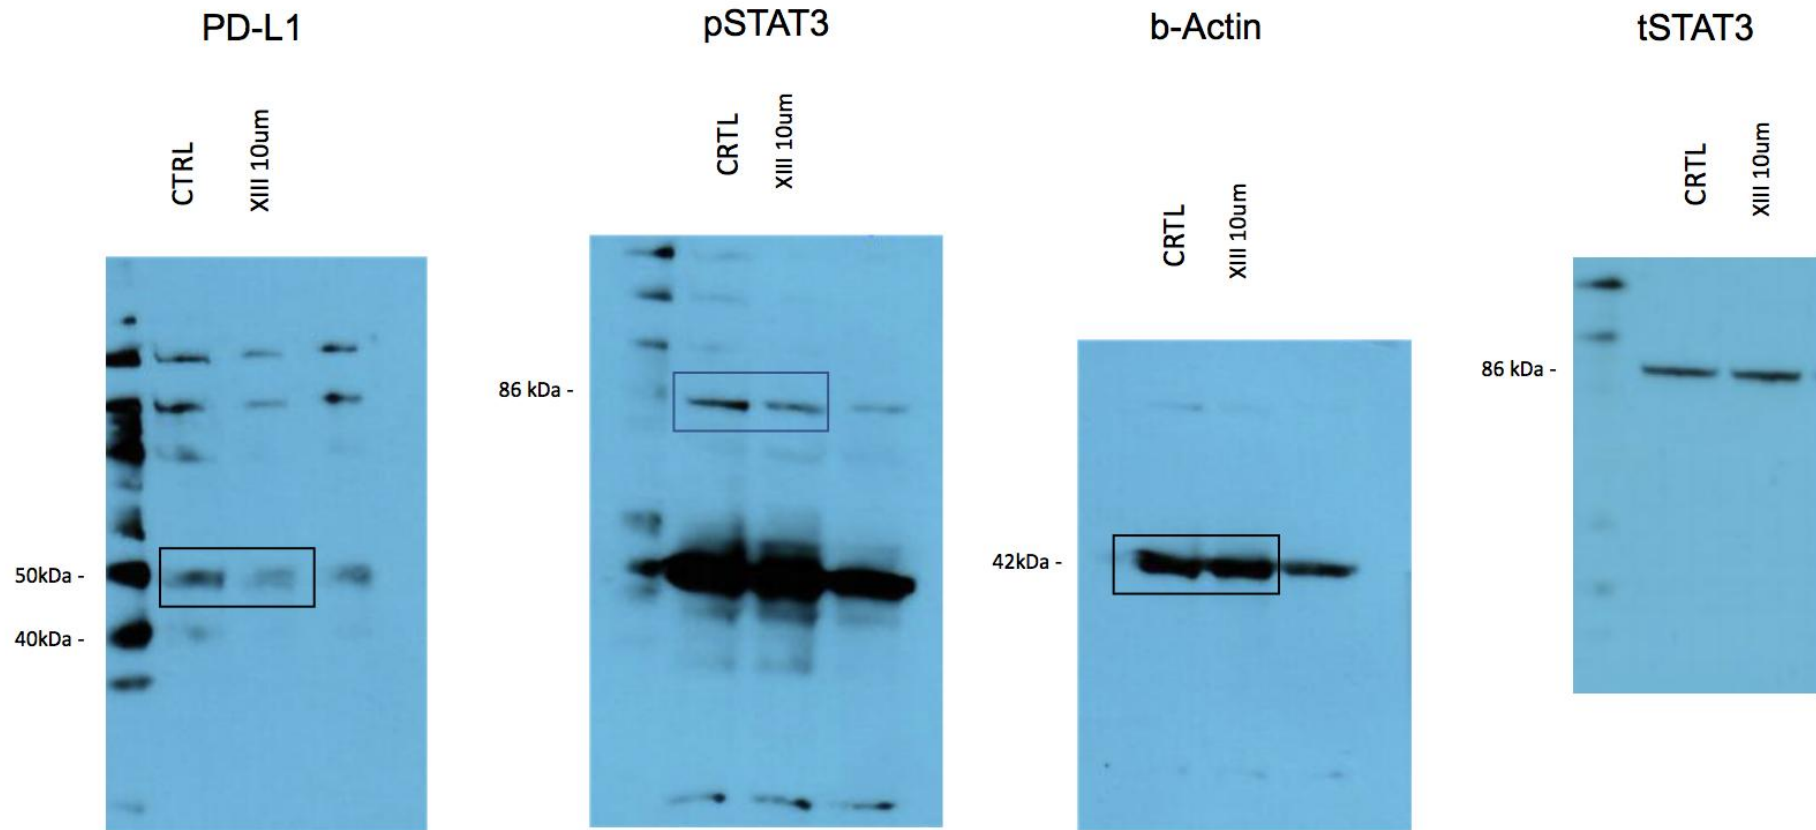

# Western blots corresponding to Fig. 2E

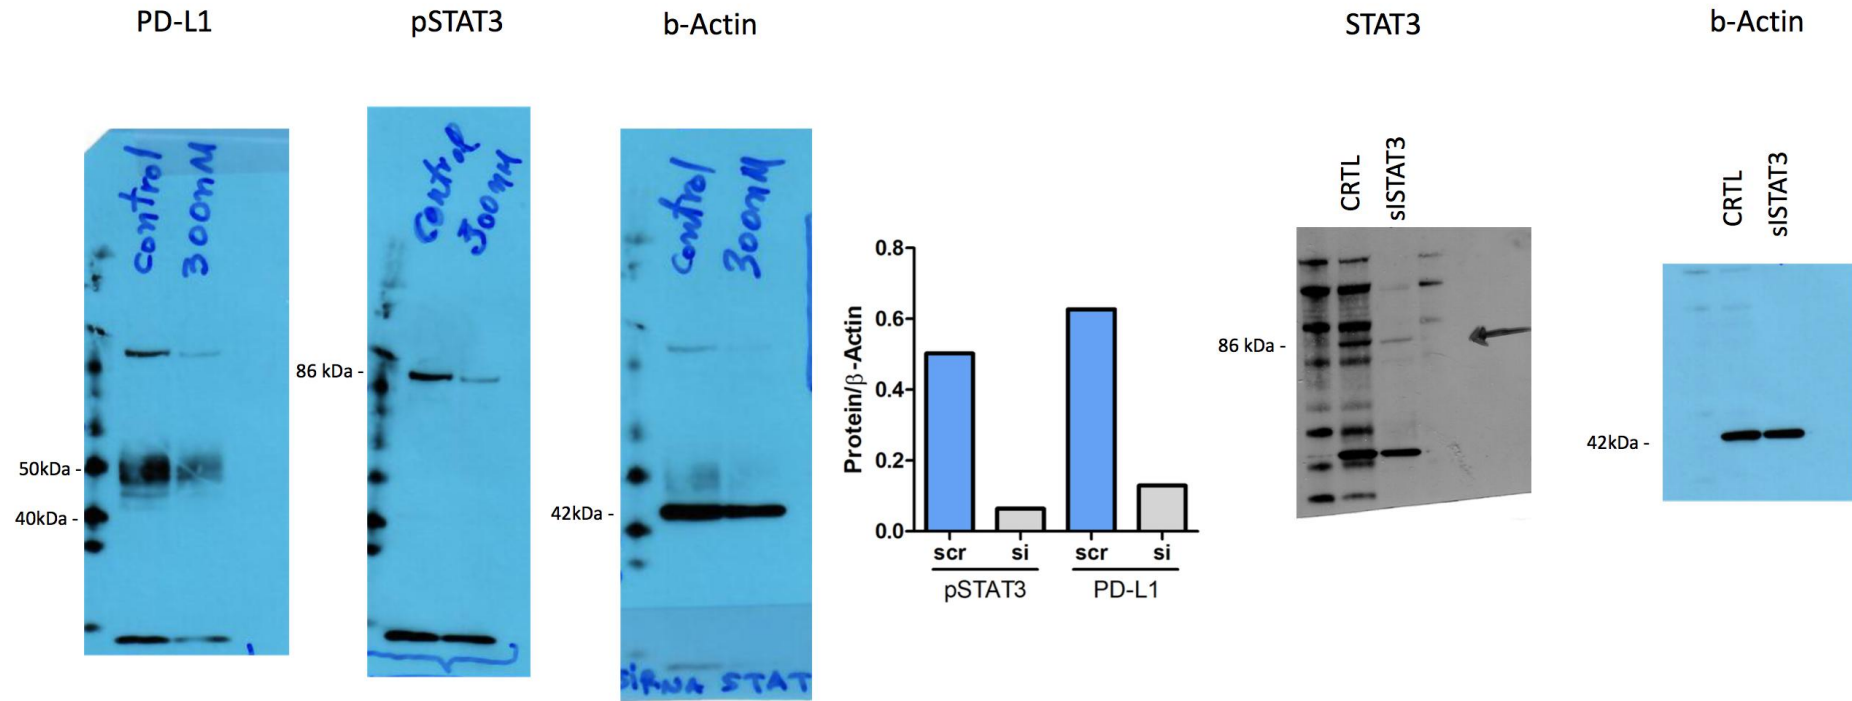

**Western blots corresponding to Fig. 2F**

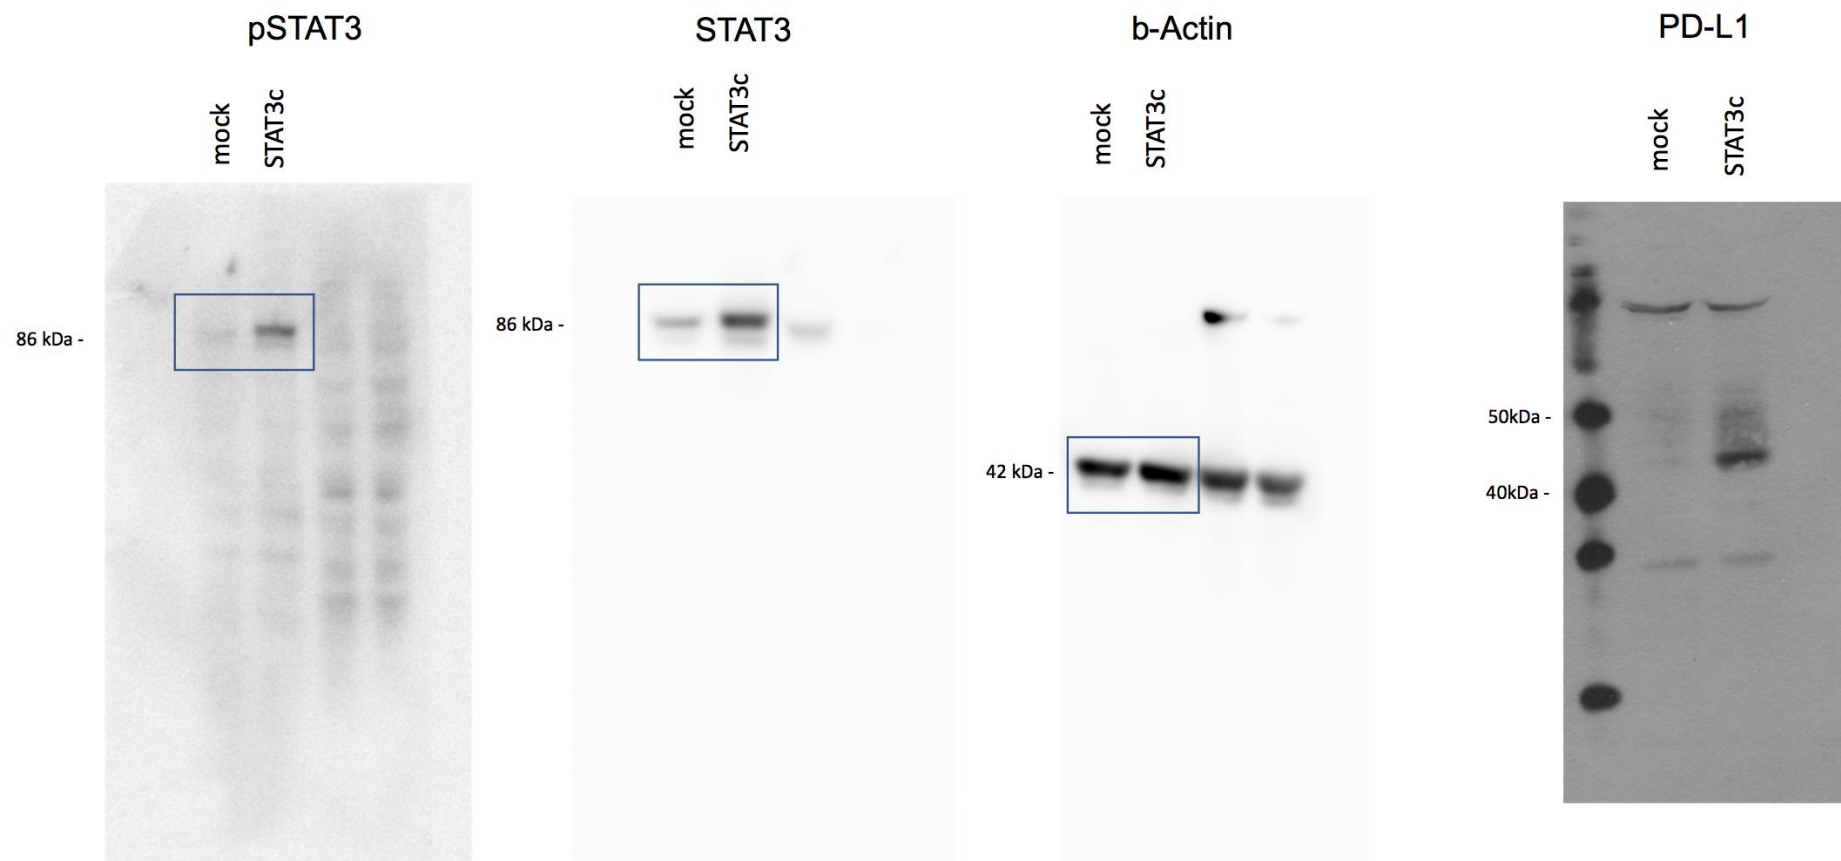

# Western blots corresponding to Fig. 2H

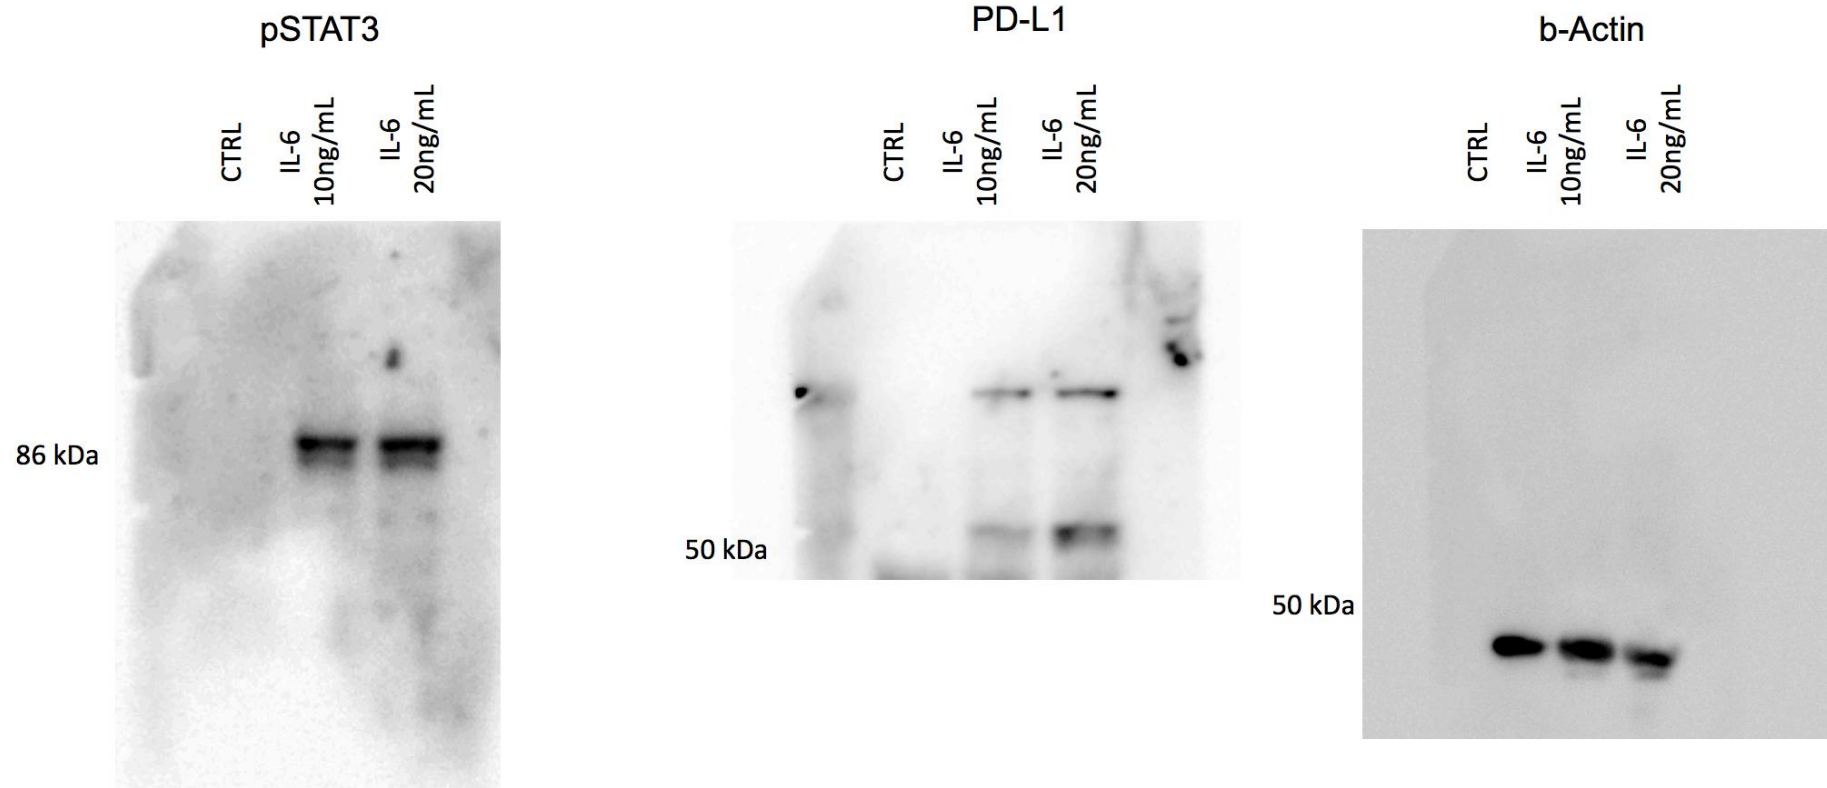

## Western blots corresponding to Fig. 3B

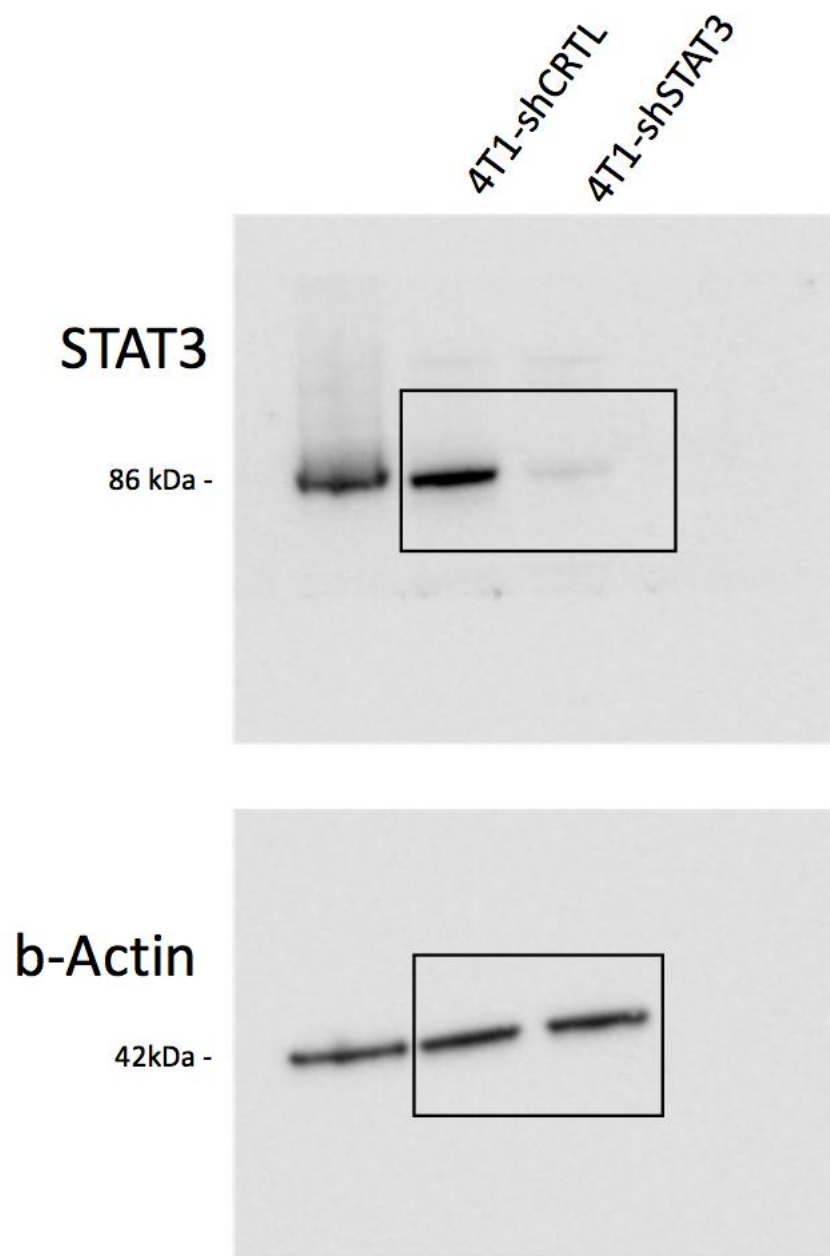

Supplement: s2 [file s2]
