# Supplementary material
Source: MDPI journal article supplement (https://www.mdpi.com/2072-6694/11/10/1479)
Supplement: s2 [file s2]

Archive with 2 entries (2 files):
- cancers-584620-suppl xml.pdf
- cancers-584620-suppl xml.docx
